# Supplementary material for: Relationship between Healthy Lifestyle and Sociodemographic Factors in Adolescents in Catalonia: Application of VISA-TEEN Questionnaire
Source: PLoS One. 2016 Sep 29;11(9):e0163381. doi: 10.1371/journal.pone.0163381 (PMC5042508; doi:10.1371/journal.pone.0163381)
Supplement: S1 File — A supplementary file with all the data has been uploaded in an Excel file, in order to offer guarantee to access data sources. (XLSX) [file pone.0163381.s003.xlsx]

## Sheet: Hoja1
TOTAL SCORE	GENDER	AGE	ORIGIN	Family Affluence Scale (FAS)	FAS_Cat	DIET	PHYSICAL ACTIVITY	Rational Use of Leisure Technology (RULT)	SUBSTANCE ABUSE	HYGIENE	URBAN / RURAL LOCATION
30	0	19	1	6	3	2	3	2.33	1	2	1
39	1	18	1	3	2	2.33	3	2.33	3	2	1
	1	21	1	7	3		2	1.33	1.5	1.5	1
39	1	15	0	6	3	1.67	3	2.67	3	2.5	1
42	1	15	0	6	3	2.67	3	2.33	3	3	1
41	1	15		6	3	2	3	2.67	3	3	1
37	1	15	1	7	3	2.33	2.67	3	2.5	1.5	1
29	1	16	1	7	3	2	1.33	1	2.5	3	1
		12									1
41	1	15	1	8	3	2.67	3	2.67	3	2	1
											1
											1
36	0	14	0	4	2	2	2.67	1.67	3	2.5	1
38	0	16	1	6	3	1.67	2.33	2.67	3	3	1
39	1	15	1	6	3	2.33	2.67	2.33	3	2.5	1
28	1	17	0	8	3	1.33	1.33	2	2.5	2	1
				4	2	1.33	3	1		2	1
											1
											1
	1	13	1	7	3		0	1.67		2	1
	1	14	1	7	3		2.67	1.67	3	3	1
32	0	15	0	3	2	2	3	0.33	2.5	3	1
33	0	16	0	5	2	2.33	1.33	2.33	2.5	2.5	1
32	0	15	1	7	3	2	3	3	0.5	3	1
30	0	15	1	9	3	2.33	2.67	2.67	0.5	2.5	1
	1	19									1
41	1	13	0	5	2	2.33	2.33	3	3	3	1
26	1	14	0	8	3	1.67	1.33	0.67	2.25	3	1
											0
	0	13									0
42	0	16	1	8	3	2.67	3	2.33	3	3	0
28	0	17		3	2	1.67	2.33	2	1	3	0
	1	16	1	6	3		3	2.67	2.5	2	0
30	1	16	1	8	3	2	2.33	2	1.5	2.5	0
29	1	16	1	4	2	2.33	3	3	0.75	0.5	0
40	0	18	1	8	3	2.33	3	2.67	2.5	3	1
34	1	15	1	7	3	2.33	3	1	3	1.5	1
28	0	16	0	4	2	1.33	2	0.33	3	2.5	1
24	0	19	0	6	3	1.33	1	2.33	1	3	1
	0	19	0	9	3	1		2	1.75	3	1
33	0	17	0	8	3	1.67	2.67	0.67	3	3	1
34	0	16	1	8	3	2.33	2.67	1	3	2	1
31	0	18	0	6	3	1	2.67	1.33	3	2	1
32	0	16	0	5	2	1.33	2.33	1.67	3	2	1
39	0	16	0	8	3	2	3	2.33	3	2.5	1
38	0	19	0	7	3	1.67	3	2	3	3	1
32	0	16	0	8	3	1.67	1.67	1.33	3	3	1
28	0	23	1	2	1	1.33	1.33	1.67	2.25	3	1
36	0	19	0	5	2	1.67	3	1.33	3	3	1
20	0	17	1	4	2	2	0.33	1.33	1.5	1.5	1
32	0	16	0	6	3	1.67	3	1.67	2.5	1.5	1
35	0	18	0	6	3	2.33	3	2.33	1.75	2.5	1
28	0	17	0	3	2	2	0.67	1.33	3	2	1
32	0	26	0	5	2	2	2.33	2	1.75	3	1
20	0	16	1	7	3	2	1.67	1	0.25	2.5	1
33	1	19	0	4	2	2.67	1.33	1	3	3	1
	1	16	0	3	2	3		1	2.5	2.5	1
30	1	19	1	6	3	1.67	2.67	1.33	2.5	1.5	1
24	1	17	0	3	2	1	0.33	1.33	2.5	3	1
34	1	22	1	5	2	2.33	2	2	2.5	2.5	1
27	0	15	0	2	1	0.67	2.67	2.67	2	0.5	1
30	0	15	0	2	1	2.33	3	1	1.75	2	1
30	0	15	1	8	3	1.33	3	2	1.75	2	1
35	0	15	1	7	3	1.67	3	2.33	2	3	1
28	0	16	0			0.67	1.67	1.33	3	2.5	1
	0	17	0	6	3	1.67	3	2.33	3		1
37	0	16	1	4	2	2.33	3	2.67	1.75	3	1
	1	14	0	2	1	2.33		2.67	3	2.5	1
40	1	14	0	3	2	2	2.33	3	3	3	1
43	1	15	0	5	2	2.33	3	3	3	3	1
22	1	16	0	9	3	2.33	1.33	1	0.5	3	1
33	1	16	0	7	3	2.33	3	1.67	1.75	2.5	1
41	1	15	0	5	2	2.33	3	2.67	3	2.5	1
39	1	16	0	7	3	2.33	3	2.33	2.5	3	1
34	1	17	0	8	3	1.67	2	2.67	2.5	2.5	1
39	0	15	0	2	1	1.33	3	2.67	3	3	1
29	0	14	0	7	3	1	1	2.33	3	2	1
35	0	13	0	3	2	1.67	1.67	2.67	3	2.5	1
37	0	12	1	6	3	2.33	1.67	3	3	2	1
41	0	13	1	8	3	2	3	2.67	3	3	1
34	0	13	0	3	2	2.33	0.67	2.33	3	3	1
41	0	13	1	7	3	2.33	3	2.33	3	3	1
35	0	13	1			2	3	2	3	1	1
34	0	13	1	7	3	2	3	0.67	3	2.5	1
35	0	14	1	4	2	1.33	3	2.33	3	1.5	1
33	0	14	1	9	3	1.67	2.67	2	3	1	1
39	0	15	0	8	3	2.33	3	2.33	2.5	3	1
39	0	14	0	6	3	2	3	2	3	3	1
42	0	13	1	8	3	2.33	3	2.67	3	3	1
36	0	15	1	4	2	2	2.33	2.67	3	1.5	1
38	0	14	1	8	3	2	3	1.67	3	3	1
33	0	15	0	3	2	1.33	2.33	1.33	3	3	1
35	0	15	1	7	3	2.33	3	1	3	2	1
39	0	16	0	3	2	2	3	2	3	3	1
25	0	15	1	7	3	1	1	2	2	2.5	1
39	0	14	1	8	3	2	3	2.33	3	2.5	1
36	0	14	0			1.67	3	2.33	2.5	2.5	1
37	0	17	0	6	3	2	2.67	2	3	2.5	1
32	0	15	1	5	2	1.67	2.33	2	3	1	1
	0	16	1	8	3	2.67	2.67	3		2.5	1
41	0	15	1	5	2	2	3	2.67	3	3	1
37	0	15	1	5	2	2.33	2	2.33	3	2.5	1
42	0	15	0	7	3	2.67	3	2.33	3	3	1
37	0	15	1	5	2	2	2.33	2.33	3	2.5	1
35	0	15	1	7	3	1.67	3	1	3	3	1
38	0	15	1	6	3	2.33	3	1.67	3	2.5	1
35	0	13	1	9	3	2.33	3	1.33	3	1.5	1
32	0	14	0	6	3	1.67	3	2.33	1.5	2.5	1
41	0	13	1	7	3	2.33	3	3	3	2	1
36	0	13	1	6	3	2	2	2.33	3	2.5	1
37	0	13	0	8	3	2.33	3	1.67	3	2	1
32	1	14	0	5	2	0.33	3	1.33	3	3	1
43	1	12	1	4	2	2.67	3	3	3	2.5	1
42	1	12	1	2	1	2.33	2.67	3	3	3	1
41	1	13	1	6	3	3	3	2.33	3	2	1
37	1	12	1	0	1	2	3	3	2.5	1.5	1
34	1	13	0	4	2	1.33	2.67	2.33	2.5	2.5	1
44	1	13	1	6	3	3	3	2.67	3	3	1
44	1	13	1	8	3	3	3	3	3	2.5	1
36	1	13	1	5	2	2.67	1	2.33	3	3	1
36	1	13	1	4	2	3	2	2.33	3	1	1
36	1	14	0	3	2	2	1.33	2.67	3	3	1
32	1	15	1	5	2	2.67	3	2.33	0.75	2.5	1
38	1	14	1	5	2	2	2.67	2.33	3	2.5	1
36	1	15	0	4	2	2	1.67	2.67	3	2.5	1
44	1	14	1	7	3	2.67	3	3	3	3	1
36	1	14	0	9	3	2	1.67	2.67	3	2.5	1
42	1	14	1	5	2	2.67	2.67	2.67	3	3	1
41	1	14	0	7	3	3	2	2.67	3	3	1
28	1	14	1	6	3	2	0.67	1.33	3	2	1
33	1	15	0	4	2	2	1.67	1.33	3	3	1
28	1	16	1	5	2	1.67	3	2	1	2	1
42	1	15	1	7	3	3	2.67	2.33	3	3	1
36	1	15	1	6	3	2.67	3	2.67	1.5	2.5	1
32	1	15	0	7	3	2.67	1	1.67	3	2	1
37	1	15	1	7	3	2.33	2.67	2.33	3	1.5	1
39	1	14	1	7	3	2.67	3	2.67	2.5	2	1
39	1	15	1	3	2	2	2.33	2.67	3	3	1
44	1	15	1	4	2	3	3	2.67	3	3	1
37	1	15	1	7	3	3	1.33	2.67	3	2	1
38	1	14	1	6	3	2	2	3	3	2.5	1
43	1	15	1	5	2	2.67	3	3	3	2.5	1
23	1	16	0	3	2	1	3	0.67	1	2.5	1
40	1	12	1	6	3	2	3	2.67	3	2.5	1
41	1	13	1	6	3	3	2	2.67	3	3	1
33	0	14	0	2	1	1.67	3	1.33	3	1.5	1
40	0	15	0	7	3	1.67	3	2.67	3	3	1
42	0	14	1	7	3	2.33	3	2.67	3	3	1
33	0	15	0	8	3	2	2	2	2.25	3	1
40	0	18	0	7	3	2	3	3	3	2	1
34	1	13	0	8	3	1.67	3	2	2.5	2	1
30	1	13	1	8	3	1.33	2.67	2.33	1.5	2.5	1
39	1	13	0	4	2	1.67	3	2.67	3	2.5	1
38	1	13	1	6	3	1.67	2.33	2.67	3	3	1
37	1	15	0	6	3	1.67	2.67	2	3	3	1
25	1	16	1	6	3	2	1.67	0.67	2	2	1
34	0	13	1			2	2.67	1	3	2.5	1
36	0	13	1	8	3	2.67	3	1.33	3	1.5	1
36	0	13	0	8	3	2.33	1.67	2.33	3	2.5	1
30	0	13	1	2	1	1.67	1.67	2	3	1	1
	0	13	0	7	3		3	2.33	2.5	2	1
42	0	13	0	7	3	2	3	3	3	3	1
36	0	13	0	6	3	1.67	2	2.33	3	3	1
37	0	13	1	3	2	2	2	2.33	3	3	1
38	0	13	1	6	3	1.67	2.67	3	3	2	1
39	0	13	1	7	3	2	3	2.67	3	2	1
37	0	14	0	2	1	2.33	2.33	1.67	3	3	1
29	0	15	0	5	2	1	3	0.67	3	1.5	1
	0	14	0	8	3		3	1	2.5	3	1
	0	14	1	2	1	1.33	3	2		3	1
34	0	14	0	8	3	2.33	3	1	2.5	2.5	1
36	0	14	0	5	2	2	3	2.33	2.5	2	1
37	0	14	1	4	2	1.33	3	2.33	3	2.5	1
41	0	14	1	9	3	2.33	3	2.33	3	3	1
37	0	14	0	8	3	2.33	3	2.33	2.5	2	1
	0	14	0	8	3	2.33	3	3		3	1
	0	14	1	2	1	1.67	3	2.33		2	1
38	0	14	0	7	3	2	2.67	2	3	3	1
37	0	14	0	2	1	2	2.67	2.33	3	2	1
39	0	14	1	8	3	2	3	2.67	3	2	1
40	0	13	1	4	2	2	2.67	2.67	3	3	1
37	0	14	0	6	3	2	2.67	1.67	3	3	1
30	0	14	1	2	1	1.67	2.67	0.33	3	2	1
32	0	15	0	8	3	1.67	3	2	2	2	1
19	0	17	0	3	2	0.33	2.67	0.67	1	2	1
	0	15	1	5	2		3	1.67	1.5	2	1
	0	15	1	9	3	0.67	3		1	2.5	1
30	0	17	0	5	2	1	3	0.67	2.5	3	1
33	0	16	0	6	3	2.33	3	1.33	1.75	3	1
27	0	16	1	6	3	2	2.67	2	0.75	2	1
23	0	18	0	4	2	2	1.33	0.67	1.25	3	1
38	0	16	0	5	2	1.67	3	2.67	3	2	1
27	0	17	1	8	3	1.67	3	2	0.75	2	1
21	0	17	0	2	1	1.67	0	2.33	1.25	2	1
40	0	16	0	7	3	2	3	2.67	3	2.5	1
34	0	16	1	6	3	2.33	2.33	2	2	3	1
20	0	16	0	4	2	1.33	1.33	2.33	0.75	1	1
40	0	15	0	6	3	2	3	2.33	3	3	1
32	0	17	0	7	3	1.33	3	2.67	1.25	3	1
31	0	17	0	4	2	2	2	1	2.5	3	1
29	0	18	0	3	2	1.67	0.67	1.33	3	3	1
32	0	18	0	7	3	2	2	1.33	2.5	3	1
30	0	17	1	5	2	1	1.33	1.67	3	3	1
35	0	18	1	5	2	1.33	2.67	2	3	2.5	1
41	0	17	0	7	3	2.67	2.67	2.33	3	3	1
33	1	15	0	8	3	1.67	3	2	2.5	1.5	1
41	1	13	1	8	3	2.67	2.33	2.67	3	3	1
41	1	14	0	6	3	1.67	3	3	3	3	1
	1	13	0	7	3	1.33	3		3	3	1
41	1	14	0	5	2	1.67	3	3	3	3	1
	1	13	1	6	3	2.67		3	3	3	1
35	1	13	0	5	2	2	3	1.67	3	1.5	1
	1	14	0	6	3		2.67	1.67	3	3	1
37	1	13	0	4	2	2	3	2	3	2	1
34	1	15	0	3	2	1	3	1.33	3	3	1
36	1	14	1	6	3	2	3	1	3	3	1
37	1	15	0	4	2	2	3	2	3	2	1
39	1	15	0	4	2	1.67	3	2.33	3	3	1
37	1	14	1	4	2	2.67	2.67	2.33	2.5	2	1
	1	15	0	5	2		1	3	3	3	1
	1	13	0	4	2		1	2	3	3	1
42	1	14	0	7	3	2	3	3	3	3	1
	1	14	0	5	2	2		2.67	3	3	1
38	1	15	1	4	2	2.67	2	2	3	3	1
35	1	15	0	4	2	2	1.33	2.33	3	3	1
25	1	16	0	7	3	2	1	1.67	1.75	2	1
38	1	14	0	5	2	1.67	3	2	3	3	1
41	1	15	1	8	3	2.33	3	3	3	2	1
30	1	19	0	6	3	1.33	2.33	1.33	2.5	2.5	1
36	1	18	0	4	2	2.67	2.67	2	2.5	2	1
35	1	17	0	5	2	2	2.33	2	3	2	1
33	1	20	0	5	2	2	1.67	2	2.5	3	1
38	1	16	1	5	2	2.67	1	3	3	3	1
34	1	17	0	8	3	3	0.67	1.67	3	3	1
34	1	17	0	3	2	2	0.67	2.67	3	3	1
31	1	16	0	7	3	2.33	0.67	1.33	3	3	1
38	1	17	0	2	1	2	2.67	2.67	3	2	1
38	1	16	0	2	1	2.67	2.67	1.67	3	2.5	1
26	1	17	1	4	2	2.33	1	2	1.25	2.5	1
26	1	17	0	3	2	2	0	1	3	2.5	1
28	1	17	0	5	2	1.67	2.33	1.67	1.75	2	1
36	1	19	1	6	3	2	2	2	3	3	1
	1	18	1	7	3		0.67	1.67	3	3	1
36	1	18	0	2	1	2.67	1	2.33	3	3	1
36	1	17	0	5	2	2.33	1	2.67	3	3	1
31	0	13	0	6	3	2.33	3	0.33	2.5	2	1
33	0	13	0	2	1	2	3	0.67	3	2	1
36	0	14	0	6	3	2	2.67	1.67	3	2.5	1
35	0	14	1	8	3	2.33	3	2.33	1.5	3	1
32	0	17	1	3	2	2.33	2.33	1	3	1.5	1
	0	16	0	7	3	2		1.67	3	2.5	1
36	0	16	0	7	3	1.67	3	1.33	3	3	1
35	0	16	0	4	2	1	2.67	2	3	3	1
30	0	16	0	2	1	2.33	1.33	2.33	2.5	1	1
36	0	15	0	8	3	2.33	2.67	1.67	3	2	1
27	0	15	0	8	3	1.67	0.67	2	2.5	2	1
	0	15	0	9	3	2		3	3	3	1
31	0	18	0	2	1	1.67	2.67	0.33	3	2.5	1
32	0	17	0	7	3	2	0.67	2.33	3	2.5	1
33	0	14	0	4	2	1.67	2.33	1.33	3	2.5	1
23	1	14	0	4	2	1.33	1.67	1.33	1.5	2	1
13	1	13	0	1	1	0.33	0.67	1.67	0.25	2	1
32	1	14	0	5	2	0.33	2.67	1.67	3	3	1
35	1	14	1	6	3	2.67	2.33	1.33	2.5	3	1
36	1	14	0	2	1	1.33	3	2	3	2.5	1
41	1	14	0	6	3	2.67	2.67	3	3	2	1
40	1	13	0	8	3	1.67	3	2.67	3	3	1
27	1	15	1	6	3	1.67	1.33	3	0.75	3	1
32	1	16	0	7	3	2	1.33	2	2.5	3	1
26	1	16	0	5	2	1.33	1.33	1.67	2.5	1.5	1
36	1	15	0	7	3	2.33	3	1.67	2.5	2.5	1
25	1	16	0	7	3	2	2.67	0.33	1	3	1
38	1	15	0	5	2	2.33	2.33	2.67	3	2	1
35	1	18	0	5	2	2.33	1.67	2.33	3	2	1
25	0	13	0	3	2	1.33	0.33	0.67	3	3	1
39	0	13	0	3	2	2	3	2.67	3	2	1
38	0	13	0	4	2	1.33	3	2.33	3	3	1
29	0	13	0	4	2	1.33	1	1.33	3	3	1
35	0	14	0	6	3	1	3	1.67	3	3	1
36	0	14	0	4	2	1.67	3	1.67	3	2.5	1
39	0	14	0	4	2	2	3	2.33	3	2.5	1
40	0	14	0	4	2	1.33	3	3	3	3	1
37	0	14	0	3	2	2	3	1.33	3	3	1
27	0	16	0	2	1	1.33	2	1.33	2.25	2	1
34	0	16	0	5	2	1.67	3	1	3	2.5	1
41	0	15	0	8	3	2	3	2.67	3	3	1
34	0	15	1	5	2	1.33	2.67	1.67	3	2.5	1
28	0	15	0	2	1	1	1.33	2	3	1.5	1
28	0	16	0	4	2	1	3	1.33	2.5	1	1
38	0	16	0	1	1	2	3	2.67	2.5	2.5	1
25	1	13	0	3	2	1.67	1	1	2.25	2.5	1
24	1	13	0	4	2	1.33	0.67	1.67	1.75	3	1
32	1	13	0	1	1	1.67	0	3	3	3	1
41	1	14	0	1	1	2	2.67	3	3	3	1
	1	14	1	5	2	1.67	2		3	3	1
33	1	14	1	6	3	2	2	1.67	3	2	1
37	1	14	1	6	3	2	3	1.33	3	3	1
38	1	15	0	2	1	2.67	1.33	2.67	3	3	1
41	1	14	0	5	2	2.67	2	3	3	3	1
43	1	15	1	7	3	2.67	3	3	3	2.5	1
33	1	15	1	4	2	1.33	3	2	2.5	2	1
35	1	16	1	6	3	1.67	3	2	3	1.5	1
38	1	16	0	7	3	2.67	2.67	1.33	3	3	1
28	1	17	0	6	3	1.67	1.67	1.33	2	3	1
30	1	16	0	4	2	2	0	2	3	3	1
30	1	19	0	5	2	2.33	0	1.67	3	3	1
43	1	16	0	6	3	2.67	3	2.67	3	3	1
30	1	16	1	4	2	2	3	2.33	1	2	1
33	0	12	0	4	2	0.67	3	1.33	3	3	1
38	0	13	1			2.33	3	1.33	3	3	1
36	0	12	0	8	3	1.67	2.67	2.67	2.5	2.5	1
43	0	12	1	5	2	2.33	3	3	3	3	1
	0	13	1	5	2	1	3		3	3	1
34	0	13	1	5	2	1.67	2.67	1.67	3	2	1
40	0	13	0	6	3	2.67	2.67	2.33	3	2.5	1
27	0	14	1	6	3	2	2.33	0.67	1.5	3	1
30	0	14	0	6	3	1.33	2.33	0.33	3	3	1
37	0	14	1	4	2	2	2.67	2	3	2.5	1
37	0	14	1	5	2	1.67	3	2	3	2.5	1
	0	14	0	7	3		2.67	2.33	2	3	1
37	0	15	0	6	3	1	3	2.33	3	3	1
43	0	14	1	5	2	2.33	3	3	3	3	1
37	0	16	1	5	2	2	3	1.33	3	3	1
37	0	15	0	6	3	1.67	3	2.33	3	2	1
	0	16	0	6	3	1.67	2	2.33	3		1
38	0	17	0	4	2	2	3	2.33	2.5	3	1
	0	18	0	4	2	2		2.33	3	1.5	1
42	0	15	1	6	3	2.33	3	2.67	3	3	1
40	0	17	0	5	2	2.33	2.67	2.33	3	3	1
33	0	17	0	5	2	1.33	2	2.33	3	2	1
38	1	12	0	5	2	2	3	2	3	2.5	1
35	1	12	0	7	3	1.67	3	1.67	3	2	1
35	1	12	1	4	2	2.33	2	2	3	2	1
41	1	12	0	6	3	2.33	3	2.33	3	3	1
44	1	12	1	8	3	2.67	3	3	3	3	1
38	1	12	0	8	3	2.33	2.67	1.67	3	3	1
32	1	13	0	6	3	2.67	0.33	2.33	3	2	1
42	1	13	0	7	3	2	3	3	3	3	1
35	1	15	0	7	3	2	3	1.33	2.5	3	1
37	1	15	1	8	3	1.67	3	1.67	3	3	1
35	1	14	1	7	3	2	3	1.33	2.5	3	1
35	1	14	0	2	1	2.33	0.67	2.67	3	3	1
21	1	16	0	5	2	1	1.33	1.33	1.25	2.5	1
29	1	15	0	6	3	2	0.67	1.67	2.5	3	1
38	1	15	1	7	3	2.67	2	2	3	3	1
40	1	15	0	4	2	2.33	2.67	2.33	3	3	1
	1	16	0	4	2	1.33	3		3	3	1
36	1	17	0	3	2	1.67	2.67	2	3	2.5	1
38	1	18	1	6	3	2.33	2	2.33	3	3	1
	1	15	1	9	3		0	2.67	3	1.5	1
39	1	16	0	2	1	2	2	3	3	3	1
28	1	17	0	6	3	1.67	1.67	0.67	2.5	3	1
39	1	18	0	4	2	2.67	3	1.33	3	3	1
33	0	16	0	8	3	2.33	2.33	1	2.5	3	1
39	0	16	0	7	3	2.33	3	2	3	2.5	1
42	0	17	0	4	2	2.33	3	2.67	3	3	1
31	0	15	1	8	3	2	3	2.33	1.25	2	1
35	0	15	0	7	3	2	2	2.33	3	2	1
25	0	18	0	6	3	1.33	1	0.67	3	2	1
29	0	17	0	6	3	2.33	0.33	1	3	3	1
29	0	18	0	8	3	2	1.67	1.67	2	2.5	1
24	1	15	1	8	3	1.67	2.33	1.67	1	1.5	1
36	1	16	1	3	2	1.33	2.67	2	3	3	1
31	1	15	1	7	3	2.33	1	1.67	3	2	1
25	1	16	0	7	3	1	0.67	1	3	2.5	1
36	1	17	0	7	3	1.67	3	1.33	3	3	1
35	1	16	0	6	3	2	2.33	1.33	3	3	1
36	1	16	0	4	2	3	1	2	3	3	1
42	1	15	1	5	2	2.33	3	2.67	3	3	1
35	1	15	1	5	2	2.67	1.67	1.67	3	2.5	1
32	1	18	0	3	2	1.67	1.33	2	3	2.5	1
	1	18	0	4	2	1		1.67	2.5	2	1
	1	18	1	7	3	2.33	2.67		3	3	1
39	0	12	1	7	3	2.33	3	2	3	2.5	1
24	0	14	0	6	3	1	3	0.33	1.25	3	1
33	0	15	1	6	3	2	2.67	1.33	3	1.5	1
33	0	16	0	5	2	2	3	2	2	2	1
36	0	16	0	8	3	1.67	2.33	2.33	3	2.5	1
31	1	13	1	9	3	1.67	3	2	1.75	2	1
35	1	15	0	4	2	2.33	3	1	3	2	1
34	1	15	1	4	2	1.67	3	1.33	3	2	1
	1	15	0	4	2		1.33	1.33	3	3	1
	1	16	0	2	1	1.33	3	2		2	1
34	1	15	1	7	3	2.33	2.67	2	1.75	3	1
30	1	17	1	7	3	2.67	1.33	1.33	2	3	1
33	0	14	1	8	3	1.67	3	0.33	3	3	1
39	0	14	0	7	3	2.33	2.33	2.33	3	3	1
33	0	13	1	7	3	1.67	3	1	3	2	1
	0	15	0	6	3		3	2		2	1
	0	15	0	7	3	2	3	2.33		3	1
36	0	20	0	8	3	2.33	2.67	1.67	3	2	1
41	0	17	0	8	3	2.33	2.33	3	3	3	1
29	0	18	1	4	2	2	2.67	2.67	0.75	2	1
38	1	13	1	9	3	2.33	3	1.33	3	3	1
	1	13	1	5	2		0	1.33	3	2.5	1
15	1	13	1	3	2	1	3	1	0	0	1
41	1	13	0	6	3	2.67	2.33	2.67	3	3	1
38	1	13	1	7	3	2.33	2.33	2	3	3	1
32	1	16	0	6	3	2	3	1.67	1.5	3	1
38	1	14	0	8	3	2.33	2.67	1.67	3	3	1
34	1	17	0	3	2	2	3	0.33	3	3	1
	1	18	1	2	1	2.67	1.33	1.33		3	1
19	1	17	1	6	3	2	0	0.67	1.25	3	1
27	1	19	0	6	3	2.33	1.67	1.33	2	1.5	1
32	1	25	1	5	2	1.33	1.67	1.67	3	3	1
26	1	19	1	5	2	2.33	2	1.67	0.5	3	1
27	1	21	0	4	2	2	2	1.33	1.25	3	1
35	0	11	1	9	3	2	3	0.67	3	3	1
32	0	13	1	5	2	2	3	1.33	2.5	1.5	1
34	0	13	0	3	2	1.67	3	1.67	3	1.5	1
31	0	12	0	8	3	1.67	2.67	0.67	3	2	1
37	0	12	1	8	3	1.33	3	2.67	2.5	3	1
40	0	12	1	8	3	1.67	3	2.67	3	3	1
39	0	12	0	7	3	2	3	2	3	3	1
34	0	13	0	7	3	2	3	1	3	2	1
	0	13	0								1
23	0	15	0	8	3	0.33	3	1	1	3	1
29	0	13	0	7	3	1	1.33	1.67	3	2.5	1
37	0	13	1	8	3	1.67	3	2.33	3	2	1
41	0	13	0	7	3	2.33	3	2.33	3	3	1
40	0	13	1	4	2	1.67	3	2.67	3	3	1
37	0	13	0	5	2	1	3	2.67	3	2.5	1
38	0	14	0	4	2	2	3	2	3	2.5	1
35	0	15	0	7	3	2.33	2.67	1	3	2.5	1
25	0	15	0	7	3	0.67	1	2	3	1	1
36	0	14	0	3	2	1.33	3	1.67	3	3	1
40	0	15	0	6	3	1.33	3	3	3	3	1
38	0	14	0	7	3	2	2.33	2.67	3	2.5	1
34	0	15	0	7	3	1.67	3	0.67	3	3	1
28	0	15	0	5	2	1.67	1	1.67	2.5	2.5	1
30	0	16	1	1	1	1.33	3	1.33	2.5	1.5	1
37	0	16	0	6	3	1.67	2.67	3	2.25	3	1
38	0	15	1	7	3	2	3	2.33	2.5	3	1
31	0	16	1	7	3	1	2.67	2.67	2	2	1
26	0	16	0	9	3	1.33	3	2.33	0.75	1.5	1
38	0	16	1	5	2	2	3	2.67	2.5	2.5	1
41	0	15	1	6	3	1.67	3	3	3	3	1
24	0	16	0	5	2	2.33	1.33	0.67	1.5	2.5	1
28	0	17	0	8	3	2	2.67	1	1.75	2	1
33	0	16	1	9	3	1.33	2.67	2.67	3	0.5	1
36	0	18	0	2	1	2	2.67	2.67	2.5	2	1
26	0	18	1	5	2	2	2	0.33	2	2.5	1
	0	16	0								1
	0	17	0								1
31	0	17	0	3	2	2	3	2.67	1	2	1
24	0	18	0	6	3	2	0.67	1.33	2	2	1
33	0	17	1	7	3	2	2.67	2	2.5	1.5	1
29	0	18	1	7	3	2	1.67	2	2	2	1
40	1	13	0	6	3	2.67	3	1.67	3	3	1
40	1	12	1	9	3	2	3	2.67	3	2.5	1
	1	12	0	4	2		1.67				1
42	1	12	0	7	3	2	3	3	3	3	1
	1	12	0	7	3	2			3	2	1
37	1	13	1	6	3	2.33	3	1.67	3	2	1
36	1	14	0	4	2	1.67	3	2	3	2	1
34	1	15	1	8	3	1.33	2	2	3	3	1
	1	15	0	7	3	1.67		1.67	2.5	2.5	1
27	1	16	1	3	2	1.33	1.33	1.33	3	1.5	1
39	1	15	1	6	3	1.67	3	2.33	3	3	1
34	1	14	1	9	3	1.67	2.33	2.67	2.5	2	1
38	1	15	0	6	3	2	2.67	2.33	3	2.5	1
35	1	15	0	8	3	2.33	1.67	2	3	2.5	1
31	1	14	0	4	2	1	0.67	2.67	3	3	1
34	1	15	1	7	3	2.67	2.67	1.67	2	2.5	1
28	1	16	0	9	3	1.33	3	2.67	0.25	3	1
32	1	15	0	4	2	1.67	2.67	2.33	2.5	1	1
	1	17	0	3	2	1.33		1.33	2.5	3	1
29	1	17	1	5	2	2	0	1.67	3	3	1
33	1	16	0	7	3	2	1.67	1.33	3	3	1
39	1	15	0	6	3	2.67	3	1.33	3	3	1
26	1	16	0	5	2	1	1.33	2	2	2.5	1
33	1	16	1	6	3	2.33	1	2	3	2.5	1
33	1	17	0	6	3	1.33	1.67	2	3	3	1
37	1	16	0	4	2	1.33	2.33	2.67	3	3	1
34	1	16	1	4	2	1.67	2.33	2.33	2.5	2.5	1
25	1	16	1			1.33	1	2.33	1.25	3	1
	1	17	1	9	3	2		1.67	3	3	1
38	1	17	0	1	1	2.33	3	1.67	3	2.5	1
25	1	17	0	6	3	2	0	2	1.75	3	1
38	1	18	0	6	3	3	1.33	2.33	3	3	1
29	0	14	1	6	3	1.33	3	2	1.5	2	1
37	0	13	1	6	3	2.33	3	1.67	3	2	1
	0	13	1	6	3		3	2	3	3	1
	0	13	1	4	2	1.67	3	2.33	3		1
36	0	14	0	8	3	2.67	3	1.67	2.5	2	1
35	0	16	0	7	3	1.67	3	1.33	3	2.5	1
30	0	14	0	7	3	1.67	0.67	1.67	3	3	1
33	0	16	0	4	2	1.67	2.67	0.67	3	3	1
34	0	16	0	1	1	2	3	1.33	2.5	2.5	1
33	0	18	0	3	2	2	2	1.67	3	2	1
34	0	16	0	5	2	1.33	3	1.67	2.5	3	1
38	0	16	0	6	3	1.33	2.67	2.67	3	3	1
39	1	13	0	2	1	2.33	2.67	2	3	3	1
	1	14	0	4	2	2		1.33	3	2.5	1
	1	14	0	6	3	1		3	3	3	1
	1	15	0	8	3		2.67	2.33	2.25	3	1
37	1	16	0	3	2	2	2.33	2	3	3	1
27	1	15	1	9	3	2	2	2	1.25	2	1
38	1	17	0	3	2	2	2.33	2.33	3	3	1
37	1	15	1	5	2	3	2.33	1.67	3	2	1
31	1	17	0	8	3	1.33	3	1.33	2	3	1
34	1	16	0	6	3	1.33	3	1	3	3	1
	1	17	0	7	3	1.67	1.67	1.67	2.5		1
28	1	17	0	5	2	2.33	0	1.67	2.5	3	1
25	1	17	0	5	2	2	0	1.33	2.5	2.5	1
39	0	14	0	6	3	2.33	3	2	3	2.5	0
40	0	14	0	3	2	2	3	2.67	3	2.5	0
39	1	13	1	7	3	2.67	2.67	2.33	3	2	0
29	0	16	1	9	3	0.67	3	1.33	2.5	2	1
38	0	14	1	8	3	2.33	3	2.33	3	1.5	1
39	0	15	1	6	3	2.33	3	1.67	3	3	1
37	0	14	0	5	2	2	3	2.33	3	1.5	1
	0	15	0	8	3		3	3	3	2.5	1
	0	16	0	5	2		3	2.33	1.75	2.5	1
26	0	16	0	6	3	2	3	0.67	1.25	2	1
	0	15	0	5	2		3	2	3	2	1
35	0	15	1	4	2	2	3	1.33	3	2	1
	0	15	1	8	3		2.67	0.67	3	3	1
34	0	14	1	9	3	2	2.33	2	2.5	2.5	1
37	1	14	1	7	3	1.67	2.67	2	3	3	1
35	1	14	0	3	2	1.67	3	1.67	3	2	1
39	1	14	0	9	3	2.67	2	2.33	3	3	1
34	1	14	0	8	3	2	2.67	2	2	3	1
32	1	14	0	3	2	2.67	1.33	1.33	3	2	1
32	1	16	0	3	2	1.33	3	1	3	2	1
21	1	16	1	9	3	2.67	0	2	0.75	2	1
25	1	17	1	6	3	2	1.33	2	0.75	3	1
40	1	15	0	6	3	2.67	3	2.33	2.5	3	1
41	1	15	1	5	2	2.67	3	2	3	3	1
44	1	15	0	4	2	2.67	3	3	3	3	1
37	1	15	1	8	3	2.33	2.33	2	3	2.5	1
33	0	14	0	8	3	2	1.67	1.33	3	3	1
38	0	15	0	5	2	2.33	2.67	1.67	3	3	1
	0	13	1	6	3		2.33	3	3	2.5	1
21	0	14	1	7	3	1	2.33	1.33	1	1.5	1
35	0	14	1	9	3	2.67	2.67	1.33	3	1.5	1
	0	16	0	8	3		2.67	1.67	3	3	1
40	0	15	1	4	2	1.67	2.67	3	3	3	1
	0	15	0								1
38	1	13	0	8	3	2.67	2	2	3	3	1
30	1	13	0	6	3	2	0	2	3	3	1
31	1	14	0	7	3	1	1.33	2	3	3	1
23	1	14	0	6	3	2.33	0.67	1.67	1	2.5	1
28	1	14	1	3	2	2.33	0.67	1	3	2	1
36	1	15	0	2	1	1.33	3	2.33	3	2	1
	1	15	0								1
33	1	15	0	6	3	2	1.33	1.67	3	3	1
30	1	16	1	8	3	2	0	2.33	3	2.5	1
37	1	15	0	5	2	2.33	1.33	2.67	3	3	1
38	0	16	1	8	3	2.33	2.67	2.33	2.5	3	1
33	0	17	1	8	3	2.33	1.67	2	2.5	2.5	1
32	1	14	0	9	3	2	2	1.33	3	2	1
25	1	16	0	4	2	2	0.67	1.33	2	2.5	1
19	1	16	1	5	2	1.67	1.33	0.67	1	2	1
	1	17	0	7	3		2.33	2	2.5	3	1
32	1	17	0	5	2	1.67	1.33	1.67	3	3	1
35	1	18	1	5	2	3	2	0.67	3	3	1
29	1	18	0	7	3	1	1.33	1.33	3	3	1
	0		0	7	3		2.33	1	3	2.5	0
35	0		0	4	2	1.33	3	1.33	3	3	0
34	0		0	1	1	1.33	2.67	2.33	3	1.5	0
39	0		0	5	2	2	3	2.33	3	2.5	0
32	0		0	4	2	1	2.67	2.33	2.5	2	0
41	0		0	5	2	1.67	3	3	3	3	0
31	0	14	0	6	3	1.33	3	0.67	3	2	0
34	0	14	0	7	3	1	3	2	2.5	3	0
39	0	14	0	7	3	2.33	3	2	3	2.5	0
	0	13	0								0
	0	14	0						1.25		0
	0	15	1								0
	0	15	1	8	3	1.67		2	2.5	3	0
30	0	18	0	8	3	1.67	3	1.67	1.25	3	0
	0	16	1								0
34	0	18	0	5	2	2	2.33	2.33	2	3	0
37	0	16	1	7	3	2	1.67	3	3	2.5	0
37	1		0	6	3	1.67	3	2	3	2.5	0
35	1		0	7	3	1.67	3	1.67	3	2	0
43	1		0	5	2	2.67	3	2.67	3	3	0
37	1		1	9	3	2.67	3	2.33	2.25	2	0
30	1		0	4	2	2.33	0	1.67	3	3	0
21	1	14	1	7	3	2	2.67	1	0.25	1.5	0
36	1	14	0	9	3	1	3	2	3	3	0
37	1	13	0	9	3	2.67	2	2.33	2.5	3	0
40	1	14	0	6	3	2.33	3	3	3	1.5	0
37	1	15	0	5	2	1.67	3	2	3	2.5	0
38	1	16	0	8	3	2.33	3	2	2.5	3	0
36	1	14	0	7	3	1.33	3	1.67	3	3	0
40	1	15	0	4	2	1.67	3	2.67	3	3	0
41	1	15	0	5	2	2.33	3	2.67	3	2.5	0
39	1	16	0	5	2	1.67	3	2.33	3	3	0
38	1	17	0	7	3	1.67	3	2.67	3	2	0
	1	18	0				3				0
	1	17	1								0
17	1	19	0	3	2	1.33	1	0.33	1	2.5	0
29	1	17	0	6	3	1	0	2.67	3	3	0
38	1	18	0	6	3	2	3	2.33	2.5	3	0
27	1	18	0	6	3	1.33	1.67	2.33	1.75	2	0
27	1	18	0	3	2	2	0	3	2.5	1	0
37	1	16	1	7	3	2.67	3	1.33	2.5	3	0
31	1	17	0	5	2	2.67	1.33	1.33	2.25	3	0
31	1	16	0	8	3	2.33	2	1.67	2.5	1.5	0
28	1	17	0	7	3	3	1.33	1.33	1.5	2.5	0
39	1	17	0	7	3	2.33	3	2.33	2.5	3	0
27	0	16	1	7	3	1.67	1.33	2.33	2	1.5	1
40	0	17	1	8	3	2	3	2.33	3	3	1
34	0	15	1	7	3	2.33	2	1.67	3	2	1
36	0	17	0	8	3	2.33	1	3	3	2.5	1
33	1	16	1	8	3	2.67	1.33	1.67	2.5	3	1
27	0	14	0	7	3	1	3	2.67	0.5	2.5	1
35	0	14	1	6	3	2	1.67	2	3	3	1
33	0	15	0	5	2	1	3	2.67	2.5	1.5	1
39	0	15	1	7	3	2.33	3	2.33	2.5	3	1
31	0	16	1	9	3	1.67	3	1	2.5	2	1
32	0	17	0	6	3	1.67	2.33	2	3	1	1
	0	16	0	7	3	2		2.33	3	3	1
32	0	17	1	4	2	2.33	2.33	1.67	2.5	1.5	1
41	1	15	0	6	3	2.33	3	2.67	3	2.5	1
28	1	15	0	7	3	1.33	0	2	3	3	1
36	1	17	0	6	3	1.67	2.33	2	3	3	1
40	0	13	1	7	3	1.67	2.67	3	3	3	1
37	0	14	0	8	3	1.67	2.67	3	2.5	2.5	1
39	0	13	0	6	3	1.67	3	2.33	3	3	1
32	0	13	1	8	3	1	2.67	2	3	1.5	1
42	0	14	1	4	2	2.67	3	3	3	2	1
30	0	14	1	5	2	1.67	2	0.67	3	2.5	1
38	0	16	0	6	3	1.67	3	2	3	3	1
38	0	14	1	6	3	1.67	2.67	2.67	3	2.5	1
38	0	15	0	6	3	2.33	3	2.33	3	1.5	1
39	0	15	0	9	3	2.33	1.67	3	3	3	1
38	0	16	1	6	3	2	2.67	2.67	3	2	1
31	0	16	1	9	3	1.33	1.67	2	2.5	3	1
38	0	16	0	6	3	1.33	3	2.33	3	3	1
30	0	17	1	6	3	1.67	3	1.67	1.75	2	1
37	1	14	0	9	3	2.33	2.67	2	3	2	1
38	1	13	0	6	3	2	3	2.33	2.5	3	1
37	1	14	1	5	2	1.33	3	3	3	1.5	1
33	1	15	0	9	3	1	3	1	3	3	1
	1	15	1	3	2	1.67		2.67	3	3	1
36	1	14	1	9	3	2.67	1.67	2.33	2.5	3	1
35	1	15	1	7	3	2.33	1.67	2.33	3	2	1
28	1	15	0	4	2	2	1.67	1.33	1.75	3	1
34	1	16	1	9	3	2.67	1.67	2	2.5	2.5	1
30	1	17	0	7	3	2	2.33	2	1.5	2.5	1
	1	17	1	8	3		2.33	2.33	2.5	3	1
38	0	14	1	8	3	2	3	2	3	2.5	1
42	0	14	1	7	3	2	3	3	3	3	1
	0	15	0								1
34	0	16	0	5	2	1.67	3	2	2.5	2	1
34	0	18	1	5	2	1.67	3	2.33	2	2.5	1
39	0	17	0	7	3	2.67	3	2.67	2.5	2	1
32	0	17	1	6	3	2.33	3	1.33	1.75	2.5	1
30	0	17	1	6	3	1.33	2.67	2	2	2	1
37	1	14	1	8	3	2.33	3	1.33	3	2.5	1
37	1	14	0	7	3	2.67	3	1.67	3	1.5	1
40	1	15	1	5	2	2.67	3	2	3	2.5	1
37	1	16	0	8	3	2.67	3	2	2.5	2	1
40	1	16	0	9	3	2.67	3	2.33	3	2	1
21	0	17	1	5	2	2	0	0.33	2.5	2	1
32	0	17	1	6	3	2	3	1.67	1.5	3	1
27	0	18	1	9	3	1.67	3	1.67	1	2	1
28	0	18	1	6	3	2.33	1.33	1.33	3	0.5	1
	0	17	1								1
	0	18	1								1
30	0	17	1	4	2	2	3	0.67	2.5	1.5	1
31	0	20	1	7	3	2	2.33	1	2.5	2.5	1
23	0	17	1	4	2	2	2.67	1.33	0.5	1.5	1
24	0	18	1	6	3	2	2.67	0.67	1	2	1
22	0	17	1	5	2	1.67	1.33	1.67	1	2	1
23	0	18	1	2	1	0.67	3	1.33	1.75	0.5	1
36	0	17	1	7	3	2	2.67	2.33	3	1.5	1
27	0	17	1	6	3	2	3	2.33	1	0.5	1
35	0	17	1	7	3	2.33	2.67	2	2.5	2	1
33	0	18	1	8	3	1.67	3	2	1.75	3	1
29	0	22	1	4	2	2	2.33	2.33	1	2.5	1
20	0	20	1	6	3	1.33	0	2.33	0.75	3	1
28	0	17	1	5	2	2	2	2.33	1.75	1	1
32	0	17	1	5	2	2.33	2.67	2	2.5	0.5	1
	0	19	1	8	3		2.67	2.67	2.5	2	1
37	0	20	1	5	2	2	3	2	2.5	3	1
22	0	16	1	6	3	1.67	0.33	0.67	2.5	2	1
33	0	17	1	8	3	2.33	2.33	0.67	3	2.5	1
22	0	19	1	6	3	1.67	2.33	1	1	1.5	1
23	0	18	1	7	3	2.33	0	0.33	3	1.5	1
33	0	18	1	7	3	2.33	2.67	1.33	2.5	2	1
30	0	19	1	7	3	2	2	1.67	2.5	1.5	1
25	0	18	1	5	2	1	3	1.33	1.75	1	1
21	0	18	1	7	3	2	0	0.67	1.75	3	1
18	0	19	1	2	1	1.67	2	1	1	0	1
24	0	19	1	6	3	2	2	1.33	0.5	3	1
27	0	17	1	7	3	2	3	2	1	1	1
30	0	17	1	7	3	1.67	2	1	3	2	1
16	0	18	1	6	3	1.67	0	1	1.75	0.5	1
32	0	17	1	6	3	2	3	2	2.5	0.5	1
21	0	19	1	7	3	2	0	1.33	1.25	3	1
30	0	16	1	9	3	2	3	2.67	0.75	2	1
30	0	17	1	8	3	2.33	3	2.33	1.25	1	1
33	0	16	1	9	3	1.33	3	2.67	2.5	1	1
	0	17	1				2.33				1
36	0	17	1	8	3	2.33	3	1.67	2.5	2.5	1
34	0	17	1	5	2	2	3	1.33	2.5	2.5	1
24	0	19	1	6	3	1	2	1.33	1.5	2.5	1
	0	18	1	5	2	1	3	1.33		2.5	1
29	0	19	1	5	2	1.33	1	3	1.75	3	1
	0	18	1	4	2		0.67	2.67		2	1
27	0	16	1	7	3	1.67	3	2	1.75	0	1
29	0	16	1	6	3	2	1.67	2	2.5	1	1
28	0	17	1	8	3	2.33	2.33	0.67	2.5	1	1
19	0	18	1	5	2	1.67	2	0.67	1	1	1
22	0	18	1	4	2	1.33	1.67	1.33	2	0.5	1
29	0	17	1	9	3	2	2	1.33	1.75	3	1
	0	17	1	6	3	2.33		0.67	1	2.5	1
35	0	16	1	8	3	1.67	3	1.67	2.5	3	1
25	0	19	1	9	3	1.33	3	0.67	1.25	2.5	1
13	0	17	1	6	3	2	0	0.33	0.5	2	1
29	0	17	1	6	3	2.33	1.67	1.67	2.5	1	1
	0	18	1	7	3	2	3	1.33		1.5	1
33	0	17	1	9	3	1	3	1.67	3	2	1
28	0	18	1	6	3	1.67	2	1.33	3	0.5	1
33	0	16	1	7	3	1.67	2.67	1.67	2.5	2.5	1
32	0	17	1	7	3	1.33	2.67	1.33	3	2	1
33	0	17	1	5	2	1.33	2.33	2.33	2.5	2.5	1
36	0	17	1	6	3	2	3	2.67	2.5	1.5	1
33	0	17	1	8	3	1.67	3	1.67	2.5	2	1
31	0	16	1	8	3	2.33	1	1.33	3	2.5	1
37	0	16	1	8	3	2.33	3	2.33	2.5	2	1
19	0	17	1	4	2	2	0	1.67	2	0	1
	0	17	1	9	3		0	2	3	2	1
39	0	17	1	9	3	2.33	2.67	3	2.25	3	1
	0	18	1								1
29	0	19	1	6	3	2.33	2.67	1	1.75	2	1
	0	21	1	6	3	2	3	2		2	1
24	0	17	1	4	2	1.67	2	1.33	1	2.5	1
29	0	18	1	5	2	2.33	1	1.67	2.5	2	1
31	0	18	1	9	3	2.33	2	1.67	2	2.5	1
35	0	19	1	7	3	2.33	2.33	1.67	2.5	3	1
29	0	17	1	7	3	1	2.67	2.33	2	1.5	1
33	0	17	1	5	2	2	2.67	2	2.5	1.5	1
37	0	20	1	7	3	2	3	2	2.5	3	1
32	0	20	1	8	3	2	2.67	3	1	2.5	1
23	0	27	1	7	3	1.33	1.67	2	1.25	1.5	1
37	0	18	1	8	3	2.33	3	2	2.5	2.5	1
36	0	26	1	3	2	2.33	3	2.33	1.75	3	1
33	0	31	1	4	2	2	1.33	2.33	3	2	1
43	0	18	1	4	2	2.67	3	2.67	3	3	1
19	0	16	1	5	2	1.33	1.67	0.67	1	2	1
33	0	16	1	7	3	1.67	3	1	2.5	3	1
29	0	18	1	9	3	1	2	2	2.5	2	1
16	0	16	1	8	3	2	2.33	0.67	0.25	0	1
25	0	17	1	5	2	1	2.67	1.67	1.25	2	1
27	0	17		8	3	1.67	3	1.33	1	2.5	1
29	0	17	1	8	3	1.33	2	0.67	3	2.5	1
34	0	17	1	8	3	2	2.67	2	2.5	2	1
22	0	19	1	5	2	1.67	0.33	0.67	2.5	2	1
20	0	17	1	4	2	1.67	0.67	2	1	1.5	1
32	0	16	1	8	3	1	2.67	1	3	3	1
24	0	16	1	3	2	1	2.67	0.67	1.5	2.5	1
23	0	17	1	7	3	1	0	0.67	3	3	1
25	0	17	1	7	3	2	2.33	1	1.75	1	1
35	0	17	1	7	3	2	3	1.67	2.5	2.5	1
27	0	16	1	5	2	2	1.67	1	3	0.5	1
34	0	16	1	5	2	1.67	3	1.67	3	1.5	1
22	0	17	1	5	2	2	0	1.67	1.75	2	1
33	0	17	1	6	3	1.33	3	1.67	2.5	2.5	1
	0	16	1	4	2	1.33		1.67	3	1.5	1
38	0	16	1	8	3	2	3	2.67	3	1.5	1
21	0	22	1	5	2	1.33	1.33	2.33	0.5	2	1
29	0	17	1	6	3	1	1.67	1.67	3	2	1
34	0	16	1	5	2	2	2.67	2.67	1.5	3	1
	0	18	1	5	2	1.67	1.33	2.33		3	1
	0	16	1								1
31	1	18	1	7	3	2	2.67	1.33	1.75	3	1
28	1	16	1	9	3	2.67	2.33	0.67	1.5	2.5	1
31	1	16	1	7	3	2	3	1	1.75	3	1
31	1	18	1	7	3	2	2	1	2.5	3	1
29	1	17	1	5	2	2.33	2	1.67	1.25	3	1
29	1	17	1	8	3	1	2.67	1.67	1.75	3	1
31	1	16	1	3	2	2	3	1.33	1.75	2.5	1
41	1	17	1	4	2	2.67	3	2.33	3	2.5	1
37	1	17	1	5	2	2.33	3	1.67	2.5	3	1
32	1	17	1	8	3	2.33	2.67	2	1.25	3	1
40	1	16	1	8	3	2	3	2.67	3	2.5	1
	1	16	1						1.5		1
	1	17	1								1
31	1	17	1	7	3	1.67	2.67	1.33	2	3	1
22	1	17	1	7	3	1.67	1.33	1	1	3	1
28	1	19	1	5	2	2.33	2.33	1.67	1.75	1	1
18	1	17	1	7	3	1.67	0	2	1	1.5	1
	1	19	1	7	3		1	1.33	2.5	3	1
30	1	19	1	6	3	1.33	1.33	1.33	3	3	1
	1	18	1	6	3	1.33		1.33	1.25	3	1
24	1	27	1	7	3	1.67	1.33	1.33	1.25	3	1
41	1	21	1	6	3	2.67	3	2	3	3	1
	1	19	1	5	2	2.33		2.33	1.75	3	1
23	0	15	1	6	3	1	3	1	1	2	1
	0	14	1	6	3	2			3	3	1
38	0	14	1	8	3	2	3	1.67	3	3	1
27	0	14	1	6	3	0.67	2.33	2	2.25	1.5	1
39	0	14	1	6	3	2.33	2.67	2.67	3	2	1
31	0	14	1	4	2	2.33	0.67	2	2.5	3	1
37	0	14	1	9	3	2.33	3	2.33	2.5	2	1
38	0	15	1	8	3	2	3	2.33	3	2	1
33	0	14	1	6	3	2.33	2.33	1.67	3	1	1
40	0	14	1	8	3	1.33	3	3	3	3	1
37	0	13	1	7	3	2	2.67	2	3	2.5	1
38	0	14	1	9	3	1.33	3	2.67	3	2.5	1
35	0	15	1	8	3	2.33	3	1.67	2	3	1
36	0	15	1	5	2	2	2.67	1.33	3	3	1
22	0	15	1	8	3	1.33	3	1	1	1	1
31	0	15	1	6	3	1.67	3	1	2.5	2	1
33	0	14	1	6	3	2	3	2	1.75	2.5	1
26	0	15	1	3	2	1.33	2.67	2	0.5	3	1
36	0	15	1	9	3	2	3	1.67	3	2	1
38	0	15	1	8	3	2	3	2.33	3	2	1
36	0	15	1	7	3	2	2.67	2.33	3	1.5	1
41	0	14	1	6	3	2.33	3	2.67	3	2.5	1
39	0	15	1	7	3	2.33	3	2.33	2.5	3	1
41	0	15	1	6	3	2.33	2.67	2.67	3	3	1
42	0	15	1	6	3	2.67	3	3	2.5	3	1
35	0	14	1	9	3	2	1.67	3	3	1.5	1
35	0	15	1	4	2	2	3	2.67	1.75	2.5	1
20	0	16	1	6	3	1	0.67	2	1.25	2	1
39	0	14	1	8	3	1.67	2.67	2.67	3	3	1
39	0	15	1	4	2	2	3	2.67	3	2	1
36	0	16	1	4	2	2	3	3	1.5	3	1
40	0	15	1	8	3	2.67	2	3	3	2.5	1
37	0	14	1	7	3	2	2.33	2.33	3	2.5	1
37	0	15	1	8	3	2	1.67	2.67	3	3	1
40	0	15	1	6	3	2.33	3	2.67	3	2	1
	0	15	1								1
31	0	17	1	5	2	2.33	3	1	1.75	2.5	1
25	0	17	1	6	3	2	2	1.67	1	2	1
34	0	16	1	7	3	2	2.67	1.33	2.5	3	1
32	0	17	1	6	3	1.67	3	1	2.5	2.5	1
	0	16	1	6	3	2		2	0.25	2.5	1
34	0	18	1	6	3	2	3	1	2.5	3	1
19	0	16	1	5	2	1.33	1.33	1.67	0	3	1
	0	16	1	5	2	1.33		2	0.25	2	1
39	0	16	1	5	2	2.33	3	2	3	2.5	1
37	0	17	1	7	3	2	3	2.33	2.5	2.5	1
36	0	16	1	7	3	2	3	1.67	2.5	3	1
37	0	16	1	4	2	2	3	3	2	2.5	1
37	0	16	1	6	3	2.33	3	2.67	2.5	1.5	1
37	0	15	1	8	3	2	3	2	3	2	1
39	0	16	1	8	3	2.33	3	2.33	2.5	3	1
34	0	16	1	8	3	2	3	3	1	3	1
32	0	16	1	5	2	1.33	3	2	1.75	3	1
42	0	16	1	7	3	2.33	3	3	3	2.5	1
39	0	16	1	8	3	1.67	3	3	3	2	1
33	1	14	1	8	3	2	2	1.67	3	2	1
35	1	14	1	7	3	2.33	2.67	1.67	3	1.5	1
32	1	14	1	5	2	1.67	3	1	3	1.5	1
41	1	13	1	7	3	2.67	3	2	3	3	1
40	1	14	1	8	3	2.67	2.67	2	3	3	1
37	1	13	1	6	3	2.33	2.33	1.67	3	3	1
	1	14	1	8	3	1.67	2.67	2.33		3	1
41	1	14	1	9	3	1.67	3	3	3	3	1
37	1	14	1	7	3	2.33	1.67	2.67	3	2.5	1
41	1	14	1	7	3	3	2	3	3	2.5	1
31	1	16	1	4	2	2.67	1.33	1.67	2.25	2.5	1
30	1	15	1	9	3	2.67	2.33	1.33	1.5	2.5	1
31	1	15	1	7	3	2	1.67	1.67	2.5	2.5	1
25	1	15	1	5	2	1.67	2.67	1.33	1	2	1
27	1	15	1	5	2	3	0.67	1	2.5	1.5	1
36	1	15	1	8	3	1.67	3	1.33	3	3	1
28	1	15	1	6	3	2.67	2	1.33	1	3	1
37	1	15	1	7	3	2.67	3	1.67	2.5	2.5	1
37	1	15	1	7	3	2.33	3	1.67	2.5	3	1
29	1	15	1	6	3	2.33	2.67	1.67	1.25	2	1
26	1	15	1	6	3	2.67	2.33	0.67	0.75	3	1
32	1	15	1	4	2	2.67	2.67	2	1	3	1
37	1	15	1	6	3	2.67	2.33	1.67	3	2.5	1
	1	15	1	8	3	2.33		2.33	2.5	1.5	1
32	1	15	1	5	2	0.33	3	2	2.5	3	1
40	1	15	1	5	2	2.67	3	2.33	2.5	3	1
37	1	15	1	5	2	2.33	1.33	2.67	3	3	1
34	1	15	1	7	3	2	3	2.33	2.5	1	1
35	1	15	1	6	3	2.33	1	2.33	3	3	1
35	1	15	1	8	3	1.67	1.33	2.67	3	3	1
28	1	14	1	7	3	2.33	0.67	2.33	1.5	3	1
40	1	15	1	8	3	2.67	3	2.33	3	2	1
40	1	15	1	7	3	2.67	3	2.67	3	1.5	1
35	1	15	1	8	3	1.67	2.33	2.33	3	2	1
41	1	15	1	8	3	2.67	3	3	2.5	2.5	1
37	1	15	1	6	3	2.33	2	2.33	3	2.5	1
36	1	15	1	6	3	2.33	1.33	2.33	3	3	1
39	1	15	1	8	3	2.67	1.33	3	3	3	1
33	1	15	1	8	3	2.33	2	2.67	2.5	1	1
42	1	14	1			2.33	3	2.67	3	3	1
38	1	14	1	8	3	3	3	2.67	1.5	3	1
31	1	15	1	4	2	2.67	2	2.33	1	3	1
35	1	15	1	8	3	2.33	2.67	2.33	2.5	1.5	1
38	1	15	1	4	2	2	2.33	2.33	3	3	1
34	1	15	1	8	3	2	1.33	2.67	2.5	3	1
40	1	15	1	8	3	3	3	2.33	2.5	2.5	1
33	1	15	1	9	3	2	3	3	1.25	2	1
35	1	14	1	6	3	1.67	2.33	2.67	2.5	2.5	1
39	1	15	1	7	3	3	2	2.67	3	2	1
42	1	15	1			2.67	3	2.33	3	3	1
40	1	15	1	8	3	2.33	2.67	2.67	3	2.5	1
37	1	15	1	9	3	2	3	1.67	3	2.5	1
33	1	16	1	8	3	2.67	3	0.67	2.5	2	1
28	1	16	1	6	3	2.67	1.33	1.33	2	2	1
31	1	16	1	7	3	2	3	1.67	1.25	3	1
41	1	16	1	8	3	3	3	1.67	3	3	1
29	1	15	1	7	3	2	2.67	2.33	1	2	1
	1	16	1	7	3	2.33		2	2.5	2	1
30	1	16	1	8	3	1.67	3	2.33	1	2.5	1
28	1	16	1	7	3	2	3	2	0.25	3	1
37	1	16	1	9	3	2.67	3	2.67	1.5	3	1
37	1	16	1	5	2	2	3	2.67	2.25	2.5	1
37	1	16	1	7	3	1.33	3	2	3	3	1
40	1	16	1	5	2	2	3	2.33	3	3	1
28	1	16	1	8	3	1.67	3	1.33	1	3	1
	1	15	1								1
35	0	13	1	5	2	2	2	2	3	2.5	1
	0	13	1	8	3		2	1.33	2	2	1
41	0	13	1	6	3	2.33	3	2.67	3	2.5	1
37	0	13	1	6	3	2	2.67	2.33	3	2	1
38	0	13	1	9	3	1.67	2.67	2.33	3	3	1
39	0	13	1	8	3	2	3	2.67	3	2	1
37	0	13	1	5	2	2.33	2.67	2.67	3	1	1
41	0	13	1	6	3	2	3	3	3	2.5	1
39	0	13	1	5	2	2	2.67	2.67	3	2.5	1
39	0	13	1	5	2	2.33	3	3	3	1	1
32	0	14	1	8	3	2	0.67	2	3	3	1
	0	13	1	4	2		2.33	3	3	1.5	1
37	0	13	1	6	3	2.33	3	2.33	2.5	2	1
40	0	13	1	6	3	2	3	2.67	3	2.5	1
43	0	13	1	5	2	2.67	3	3	3	2.5	1
37	0	13	1	7	3	2.33	1.33	2.67	3	3	1
39	0	13	1	8	3	2.33	2.33	2.67	3	2.5	1
35	0	13	1	7	3	2.33	2.33	2	3	1.5	1
39	0	13	1	6	3	2	2.33	2.67	3	3	1
35	0	14	1	2	1	1.67	1.67	3	3	2	1
39	0	13	1	7	3	2.33	2	2.67	3	3	1
39	0	13	1	6	3	1.67	2.33	3	3	3	1
40	0	12	1	5	2	2.33	3	2.67	3	2	1
27	0	13	1	7	3	1	3	1	1.5	3	1
36	0	13	1	6	3	2	3	1	3	3	1
40	0	12	1	7	3	2.33	3	2	3	3	1
27	0	14	1	5	2	2	3	0.67	1	3	1
39	0	14	1	6	3	2.33	3	2.33	3	2	1
41	0	14	1	8	3	2	3	2.67	3	3	1
38	0	14	1	6	3	2.33	3	1.67	3	2.5	1
32	0	15	1	7	3	1.33	3	1.67	2	3	1
38	0	14	1	6	3	2	3	2	3	2.5	1
40	0	14	1	6	3	2	3	2.67	3	2.5	1
38	0	14	1	6	3	2	2.67	2.33	3	2.5	1
39	0	14	1	5	2	2.67	2.67	3	2.5	2	1
42	0	14	0	6	3	2	3	3	3	3	1
32	0	14	1	6	3	2	1.67	2.67	2.5	1.5	1
39	0	14	1	4	2	1.67	2.67	3	3	2.5	1
33	0	14	1	4	2	2.33	0.67	2.33	3	2.5	1
36	0	14	1	8	3	2.33	1.67	2.67	3	2	1
40	0	14	1	7	3	2	3	2.67	3	2.5	1
32	0	14	1	7	3	2	2	2	3	1	1
39	0	14	1	6	3	1.67	3	3	3	2	1
38	0	13	1	7	3	2	2.67	2.33	3	2.5	1
36	0	14	1	5	2	2.33	2.67	2	2.5	2.5	1
28	0	14	1	8	3	1.67	1.67	1	2.25	3	1
32	0	14	1	6	3	1.67	2.33	1.33	3	2	1
31	0	15	1	6	3	2	3	0.67	3	1	1
39	0	14	1	8	3	2	3	2	3	3	1
35	0	15	1	9	3	2	2.33	2.67	2.5	2	1
38	0	15	1	3	2	2	3	2.33	3	2	1
34	0	14	1	4	2	2.33	2.67	2.33	1.75	2.5	1
35	0	15	1	8	3	2	2.33	2	3	2	1
40	0	15	1	7	3	2.33	2.67	2.67	3	2.5	1
40	0	15	1	5	2	2.33	3	2.67	3	2	1
38	0	15	1	3	2	2	3	2.33	3	2	1
34	0	15	1	7	3	2	3	2.33	3	0	1
41	0	15	1	8	3	2.33	3	2.67	3	2.5	1
41	0	15	1	8	3	2	3	2.67	3	3	1
39	0	15	1	9	3	2.67	2.67	2.33	2.5	3	1
39	0	15	1	7	3	2	2.67	2.33	3	3	1
34	0	15	1	6	3	2	2.33	2.33	2.5	2	1
39	0	15	1	7	3	2.67	3	2	3	2	1
42	0	15	1	6	3	2.67	3	3	3	2	1
40	0	16	1	7	3	2.67	3	2.33	3	2	1
39	0	15	1	8	3	2.33	2	2.67	3	3	1
38	0	14	1	6	3	2.67	3	2.33	3	1	1
42	0	14	1	8	3	2.33	3	2.67	3	3	1
32	0	15	1	5	2	2.33	3	2.67	1.75	0.5	1
39	0	15	1	4	2	2.67	3	2	2.5	3	1
38	0	15	1	7	3	1.33	3	2.33	3	3	1
41	0	15	1	5	2	2.67	2.67	2.67	3	2.5	1
37	0	15	1	7	3	2	2.67	2.67	3	1.5	1
36	0	15	1	5	2	2.33	3	1.67	2.5	2.5	1
41	0	13	1	8	3	2.33	3	2.67	3	2.5	1
39	0	13	1	7	3	2	3	2.67	3	2	1
38	0	13	1	5	2	2	2	2.67	3	3	1
36	0	12	1	4	2	2	1.67	3	3	2	1
43	0	13	1	7	3	2.33	3	3	3	3	1
37	0	13	1	9	3	2	2	2.67	3	2.5	1
43	0	12	1	4	2	2.33	3	3	3	3	1
40	0	13	1	7	3	2	2.67	3	3	2.5	1
32	0	13	1	6	3	2	2.67	0.67	3	2	1
30	1	13	0	8	3	1	2.67	0.67	3	2.5	1
38	1	13	1	8	3	2.33	3	2.67	2.5	2	1
32	1	12	1	7	3	2.67	2.67	2.67	1	2	1
37	1	13	1	7	3	2.33	2.67	2.67	2.5	2	1
	1	13	1	8	3	2.67		3	3	3	1
43	1	12	1	8	3	2.67	3	2.67	3	3	1
41	1	12	1	8	3	2.67	3	2.67	3	2	1
37	1	13	1	7	3	2.67	1	3	3	2.5	1
41	1	12	1	8	3	2.67	3	2.67	3	2	1
39	1	13	1	6	3	3	2.33	2.33	3	2	1
42	1	14	1	8	3	2.67	3	2.33	3	3	1
	1	13	1	8	3		2.67	1.33	2.5	2.5	1
42	1	13	1	5	2	2.67	2.67	2.67	3	3	1
43	1	13	1	6	3	3	3	2.67	3	2.5	1
37	1	13	1	8	3	2	3	2	3	2	1
40	1	13	1	7	3	3	3	1.67	3	2.5	1
32	1	14	1	5	2	2	2.67	1.33	2.5	2	1
39	1	14	1	7	3	2.67	3	2	3	2	1
36	1	16	1	5	2	1.67	3	2	2.5	3	1
29	1	16	1	6	3	1.33	2	2.67	1.75	2	1
43	1	14	1	8	3	2.67	3	3	3	2.5	1
40	1	14	1	7	3	2.67	3	2.67	2.5	2.5	1
39	1	14	1	8	3	2.33	2	2.67	3	3	1
33	1	15	1	4	2	2	2.67	2.33	2	2	1
40	1	14	1	6	3	2.67	2.67	2.33	3	2.5	1
40	1	14	1	7	3	2.67	2	3	3	2.5	1
37	1	14	1	6	3	2	1.67	2.67	3	3	1
	1	15	1	4	2		1.33	2.67	2.5	3	1
40	1	14	1	6	3	1.67	3	3	3	2.5	1
44	1	14	1	5	2	2.67	3	3	3	3	1
39	1	14	1	6	3	2.33	1.67	3	3	3	1
40	1	14	1	7	3	2.33	2.33	3	3	2.5	1
45	1	14	1	7	3	3	3	3	3	3	1
44	1	14	1	8	3	2.67	3	3	3	3	1
37	1	14	1	5	2	2.67	2.33	2.33	2.5	2.5	1
42	1	14	1	7	3	3	2	3	3	3	1
42	1	14	1	6	3	3	3	2	3	3	1
44	1	14	1	4	2	2.67	3	3	3	3	1
42	1	14	1	7	3	3	2	3	3	3	1
32	1	14	1	7	3	2.33	0.33	2.33	3	2.5	1
41	1	14	1	8	3	2.67	2	3	3	3	1
43	1	14	1	7	3	2.67	3	3	3	2.5	1
32	1	14	1	7	3	2.33	1.33	1.33	3	2.5	1
29	1	15	1	5	2	1.67	2.33	1.33	2	2.5	1
34	1	15	1	5	2	2.67	3	1.67	1.5	3	1
37	1	15	1	6	3	2.67	3	1.67	2.5	2.5	1
28	1	16	1	6	3	1.67	3	1.67	1	2.5	1
29	1	15	1	7	3	2.33	2.67	2	1	2	1
36	1	15	1	7	3	2.33	2.33	2.33	2.5	2.5	1
35	1	15	1	8	3	2.33	1.67	2.67	2.5	2.5	1
39	1	15	1	8	3	3	2.33	2.33	2.5	3	1
33	1	16	1	6	3	2	1.67	2.67	2.5	2	1
33	1	15	1	6	3	2.33	2.33	2.33	1.5	3	1
40	1	15	1	6	3	2	3	2.67	3	2.5	1
37	1	16	1	5	2	1.67	2.67	2.67	2.5	3	1
39	1	14	1	8	3	2.67	1.67	2.67	3	3	1
27	1	15	1	5	2	2	1	2.33	1.5	2.5	1
43	1	15	1	6	3	2.67	3	2.67	3	3	1
	1	15	1	4	2		0.67	3	2.5	2.5	1
40	1	15	1	3	2	3	3	2.33	2.5	2.5	1
36	1	15	1	5	2	2.33	2	2.33	3	2	1
44	1	14	1	7	3	3	3	2.67	3	3	1
32	1	12	1	7	3	2	1	1.67	3	3	1
38	1	13	1	7	3	2.33	2.67	2.33	3	2	1
42	1	13	1	5	2	2.67	2.67	2.67	3	3	1
44	1	13	1	4	2	3	3	2.67	3	3	1
33	1	14	0	2	1	1.33	1.67	2	3	3	1
30	1	13	1	8	3	2	0.67	2.67	3	1	1
43	1	13	1	7	3	2.33	3	3	3	3	1
36	1	13	0	7	3	2.33	1	2.67	3	3	1
39	1	13	1	4	2	2.67	1.67	3	3	2.5	1
42	1	12	1	6	3	2.33	3	3	3	2.5	1
44	1	13	1	4	2	2.67	3	3	3	3	1
40	1	13	1	7	3	2.67	3	2.67	3	1.5	1
41	1	12	0	7	3	2	3	2.67	3	3	1
40	1	12	1	6	3	3	2.67	2.67	3	1.5	1
33	1	13	1	6	3	1.67	2.33	1.67	3	2	1
39	0	14	1	7	3	2.33	3	2.33	2.5	3	1
39	0	13	1	9	3	1.67	3	2.33	3	3	1
38	0	13	1	6	3	2.33	1.67	3	3	2.5	1
37	0	12	1	7	3	2	3	2.33	2.5	2.5	1
31	0	14	1			2.33	2.67	2.33	1	2.5	1
39	0	12	1	5	2	2.33	3	2.33	3	2	1
40	0	13	1	6	3	2	3	2.33	3	3	1
36	0	13	1	7	3	2.33	1.67	3	2.5	2.5	1
43	0	12	1	5	2	2.67	3	3	3	2.5	1
30	0	15	1	2	1	2	0	2	3	3	1
40	0	12	1	8	3	2	2.67	3	3	2.5	1
40	0	13	1	9	3	1.67	3	3	3	2.5	1
30	0	13	1	3	2	2.33	0	2	3	2.5	1
24	0	15	1	8	3	1.33	3	2	0.25	2	1
34	0	14	1			2	3	1.33	3	1.5	1
	0	14	1	7	3	1	3	2		2.5	1
34	0	14	1	9	3	2	3	1	3	2	1
37	0	15	1	7	3	2	3	1.67	3	2.5	1
37	0	14	1	9	3	1	3	2.67	3	2.5	1
39	0	14	1	9	3	2.33	3	2.67	2.5	2.5	1
39	0	14	1	8	3	2	3	2	3	3	1
28	0	14	1	7	3	2	0	2	3	2	1
41	0	14	1	9	3	2	3	2.67	3	3	1
38	0	14	1	7	3	2	3	2.33	3	2	1
40	0	14	1	9	3	2	3	2.67	3	2.5	1
11	0	15	1	9	3	0.33	3	0.33	0	0	1
12	0	16	1	9	3	0.67	3	0.33	0	0	1
27	0	15	1	9	3	2	3	1	2.25	0	1
19	0	15	1	7	3	2.33	2.33	0.33	0.25	1.5	1
33	0	15	1	9	3	2.33	2	1.67	2.5	2.5	1
34	0	15	1	4	2	1	3	3	3	0.5	1
34	0	14	1	7	3	2.33	3	3	0.75	3	1
37	0	16	1	9	3	2.67	3	2.67	1.75	2.5	1
28	0	16	1	7	3	1.67	3	2	1	2	1
29	0	16	1	4	2	1	3	1	2.25	2.5	1
25	0	16	1	6	3	1.67	3	1.33	1	1.5	1
25	0	17	1	6	3	2	2.33	1.33	0.5	3	1
34	0	15	1	8	3	1.67	3	1	3	2.5	1
26	0	16	1	8	3	1	2.67	1.33	1.5	2.5	1
27	0	17	1	6	3	2.33	1.67	2	1	2.5	1
	0	17	1	6	3	1	3	2.33		1.5	1
32	0	16	1	6	3	2.33	3	2.33	1	2.5	1
32	0	16	1	7	3	1.67	3	3	1	2.5	1
32	0	17	1	6	3	1.33	3	2.33	2.5	1	1
39	1	13	1	4	2	2.67	2.33	2	3	3	1
37	1	13	1	8	3	2.33	3	1.33	3	2.5	1
42	1	13	1	9	3	2.33	3	2.67	3	3	1
42	1	13	1	8	3	2.67	3	2.67	3	2.5	1
35	1	13	1	7	3	1.67	2	2.67	3	2	1
40	1	13	1	7	3	2.33	2	3	3	3	1
43	1	13	1	7	3	2.33	3	3	3	3	1
37	1	13	1	6	3	2.33	3	1	3	3	1
31	1	14	1	8	3	2.33	3	2	0.75	3	1
27	1	14	1	6	3	1.67	0.67	1.67	2.5	2.5	1
35	1	14	1	7	3	2	2.67	2.33	2	3	1
40	1	14	1	6	3	2.33	2.67	2.33	3	3	1
39	1	14	1	7	3	2	3	2.33	3	2.5	1
39	1	13	1	8	3	2.67	3	2.67	2.5	2	1
36	1	14	1	9	3	2.67	2.33	2.33	2	3	1
	1	15	1	7	3	0.67		1.33	3	2.5	1
36	1	15	1	9	3	2.33	3	1.33	2.5	3	1
34	1	15	1	5	2	2	2.33	1.67	2.5	3	1
36	1	15	1	7	3	3	1.33	1.67	3	3	1
25	1	16	1	4	2	1.67	0.33	2	2.25	2	1
33	1	15	1	8	3	2.33	3	2	1.75	2	1
35	1	15	1	9	3	2.67	3	1.33	2.5	2	1
31	1	16	1	7	3	2	0.33	2.67	3	2	1
37	1	15	1	7	3	2.33	2	2.67	2.5	3	1
35	1	15	1	7	3	2.67	2.33	2.33	2.5	1.5	1
29	1	16	1	3	2	1.67	2.33	1	2.5	2	1
37	1	16	1	9	3	1.33	3	2	3	3	1
	1	16	1	8	3	2.33		2	1.5	3	1
31	1	15	1	5	2	2.33	3	1.33	1.75	2	1
34	1	16	1	7	3	2	2.67	2.33	2.5	1.5	1
31	1	16	1	5	2	1.67	2.33	2.33	2.5	1	1
36	1	17	1	9	3	2.33	1.67	3	2.5	2.5	1
38	1	16	1	8	3	2	3	2.33	2.5	3	1
35	1	16	1	6	3	2.33	2	2.33	2.5	2.5	1
	0	13	1	9	3		2.67	0.67	2.5	1.5	1
33	0	13	1	5	2	1	3	2	3	1.5	1
36	0	13	1	8	3	2.33	3	1.67	2.5	2.5	1
35	0	13	1	6	3	2.33	3	1	2.5	3	1
	0	13	1	8	3			2.67	3	2.5	1
36	0	12	1	8	3	2.33	3	2.33	3	0.5	1
	0	13	1	9	3		3	2.33	3	3	1
	0	13	1	6	3	1		2	3	1.5	1
	0	13	1	6	3	2.33		2.67	3	1	1
42	0	13	1	6	3	2.33	3	3	3	2.5	1
39	0	12	1	7	3	2	3	2.67	3	2	1
39	0	12	1	7	3	1.67	2.67	3	3	2.5	1
41	0	13	1	7	3	2.33	3	3	3	2	1
36	0	13	1	6	3	1.67	3	2.33	3	1.5	1
36	0	14	1	5	2	1.33	3	2.33	3	2	1
42	0	13	1	8	3	2	3	3	3	3	1
38	0	13	1	8	3	2	3	1.67	3	3	1
35	0	15	1	5	2	2.33	3	1	2.5	3	1
37	0	14	1	9	3	2	3	1.33	3	3	1
34	0	14	1	5	2	2	1	2.33	3	3	1
34	0	14	1	9	3	1	3	1.67	3	2.5	1
	0	13	1	8	3		3	2	3	1.5	1
40	0	14	1	8	3	2	3	2.67	3	2.5	1
35	0	14	1	9	3	2	3	2	3	1	1
43	0	14	1	9	3	2.67	3	3	3	2.5	1
32	0	13	1	8	3	2.33	0.67	2.33	3	2	1
41	0	14	1	9	3	2	3	3	3	2.5	1
35	0	14	1	8	3	1	3	2.33	3	2	1
38	0	14	1	9	3	2	2	3	3	2.5	1
	0	14	1	7	3		2.67	1.67	3	2.5	1
	0	14	1	8	3	1		2.67	3	1.5	1
36	0	14	1	6	3	2	2.33	2.67	3	1.5	1
40	0	14	1	9	3	2	3	2.33	3	3	1
35	0	15	1	6	3	1	3	2.33	2.5	3	1
38	0	16	1	7	3	1.67	3	2	3	3	1
39	0	15	1	4	2	2.33	2.33	2.33	3	3	1
27	0	16	1	6	3	1.67	2.67	0.67	2.25	1.5	1
	0	16	1	3	2	1.67		2.33	2.5	2.5	1
35	0	16	1	8	3	1.67	3	2	2.5	2.5	1
35	0	16	1	3	2	2	3	2.67	2.5	1	1
32	0	16	1	6	3	1	2.67	2	3	1.5	1
38	0	16	1	7	3	2.67	3	2.67	1.75	3	1
42	0	16	1	8	3	2.33	3	2.67	3	3	1
	0	17	1	7	3	1.67		1	2.5	1.5	1
25	0	17	1	6	3	1	1.67	0.67	2.5	2.5	1
29	0	17	1	5	2	2	3	1.33	2	1	1
30	0	17	1	8	3	2.33	2.33	1.67	1.5	2.5	1
37	0	17	1	6	3	2.33	3	2	3	1.5	1
31	0	18	1	4	2	2	2.67	1.33	2.5	1.5	1
31	0	17	1	5	2	2	2.33	2.33	1.25	3	1
31	0	17	1	5	2	1.33	1.33	2	3	2.5	1
32	0	17	1	5	2	1.67	2.67	2.67	1.25	3	1
	0	17	1	6	3	2	3		2		1
28	0	17	1	5	2	2.33	0.67	2.33	1.5	3	1
33	0	17	1	7	3	1.33	2.67	2	2.5	2.5	1
36	0	17	1	9	3	2	3	2.67	2	2.5	1
39	1	13	1	8	3	2.67	2.67	2	3	2.5	1
30	1	13	1	7	3	1.67	1.67	1.67	2.5	2.5	1
36	1	13	1	6	3	1	2.33	2.67	3	3	1
	1	12	1	5	2		1.33	2.67	3	2	1
30	1	13	1	7	3	2	1	2	3	1.5	1
38	1	13	1			2	3	3	2.5	2	1
40	1	13	1	6	3	2.33	3	3	2.25	3	1
34	1	13	1	6	3	2	0.67	2.67	3	3	1
41	1	13	1	6	3	2	3	3	3	2.5	1
	1	13	1	7	3	2.33		2.67	3	2.5	1
43	1	13	1	9	3	2.67	3	2.67	3	3	1
43	1	13	1	7	3	2.33	3	3	3	3	1
40	1	13	1	8	3	2.33	2.33	2.67	3	3	1
38	1	13	1	6	3	2	2	2.67	3	3	1
41	1	13	1	6	3	2.33	2.67	2.67	3	3	1
43	1	13	1	7	3	2.67	3	2.67	3	3	1
32	1	13	1	3	2	2.33	0.33	2	3	3	1
33	1	14	1	8	3	2.67	0.67	1.67	3	3	1
36	1	14	1	8	3	1.67	3	1.33	3	3	1
32	1	14	1	7	3	1.33	2.33	1.67	2.5	3	1
28	1	14	1	6	3	1	2	1.67	2.5	2	1
	1	14	1	6	3		3	2.33	3	3	1
34	1	14	1	7	3	1.33	2	2	3	3	1
39	1	14	1	6	3	2.33	2.67	2	3	3	1
37	1	14	1	5	2	2.33	2.33	2.67	3	1.5	1
40	1	14	1	6	3	2.33	3	2	3	3	1
	1	14	1	5	2		0.67	2.33	3	3	1
37	1	13	1	4	2	1.67	2.67	2	3	3	1
36	1	16	1	3	2	2.33	2	1.67	3	3	1
34	1	16	1	4	2	1.33	2.67	1.67	3	2.5	1
31	1	16	1	9	3	3	1.33	1.67	1.75	3	1
27	1	17	1	5	2	2	0.67	1.33	2.5	2.5	1
21	1	16	1	4	2	1.67	0.67	1.67	1.25	2	1
30	1	16	1	8	3	2	2.67	2	1.25	2.5	1
34	1	16	1	8	3	2.67	3	1.33	1.75	3	1
33	1	16	1	7	3	2	2.67	2	2.5	1.5	1
34	1	16	1	7	3	2.67	1.67	1.33	3	2.5	1
38	1	16	1	7	3	2.67	2.67	2.67	2	3	1
39	1	16	1	7	3	3	2.67	2.33	2.5	2.5	1
38	1	16	1	9	3	2	3	2	3	2.5	1
	1	16	1	8	3	2.67		2.67	2.5	2.5	1
32	1	16	1	8	3	2.33	1.67	2.33	1.75	3	1
35	1	16	1	6	3	2.67	2.67	2.33	2	2	1
31	1	17	1	6	3	3	0.33	1.67	3	2	1
27	1	17	1	7	3	2.33	0.67	1.33	2.5	2	1
30	1	18	1	7	3	1.33	3	1	2.5	2	1
30	1	16	1	7	3	2.33	1.33	2	2	2.5	1
38	1	17	1	6	3	2.67	2.67	2	2.5	3	1
30	1	17	1	6	3	2.67	0	2	3	2	1
32	1	17	1	2	1	2	1	2.33	3	2	1
36	1	16	1	9	3	3	2	2.67	2.5	1.5	1
33	1	17	1	6	3	1.33	2.67	2.33	2	3	1
	1	17	1	4	2	3		2.67	2	3	1
	1	17	1	2	1	2.67		2.67	3	2.5	1
22	0	15	1	7	3	1	2.67	1.33	1.5	0.5	1
41	0	13	1	8	3	2.33	3	3	3	2	1
	0	12	1	4	2	2		1	3	1	1
37	0	15	1	5	2	2.33	1.67	2.67	3	2.5	1
34	1	13	1	8	3	2.67	2.67	0.67	2.5	3	1
42	1	12	1	7	3	2	3	3	3	3	1
40	1	13	1	9	3	2.33	3	3	3	1.5	1
35	1	15	1	8	3	2	3	1.67	3	1.5	1
	1	15	1	3	2	1.67	3		3	3	1
35	1	15	1	9	3	2	3	2	3	1	1
	1	16	1	3	2	2		2	2.5	3	1
21	1	18	1	6	3	2.33	0	1	1.75	2	1
25	1	19	1	4	2	1.67	1.33	1.67	1.5	2.5	1
43	1	19	1	8	3	2.33	3	3	3	3	1
38	1	17	1	5	2	2.67	2.67	2.33	2.5	2.5	1
36	0	13	1	6	3	2	2.67	1.33	3	3	1
36	0	13	1	6	3	1.33	3	1.67	3	3	1
	0	14	1	7	3		0		3	2.5	1
34	0	13	1	5	2	1.67	2.67	2	3	1.5	1
32	0	13	1	6	3	0.67	2.33	2.33	3	2	1
37	0	12	1	6	3	2	3	2.67	3	1	1
38	0	13	1	4	2	2.33	3	1.67	3	2.5	1
33	0	14	1	6	3	2.33	3	1.67	2	2	1
25	0	15	1	4	2	1.67	3	2.67	0.5	0.5	1
36	0	15	1	5	2	2.33	3	2	2.5	2	1
32	0	15	1	8	3	1.67	2	1.33	3	2.5	1
27	0	15	1	5	2	2	0.67	1.67	2.5	2	1
40	0	15	1	4	2	2.67	2.67	2	3	3	1
36	0	15	1	4	2	2	3	2.67	2.5	1.5	1
29	0	15	1	5	2	1	2.33	2	2.25	2	1
40	0	15	1	8	3	2.33	3	2.67	2.5	3	1
30	0	16	1	9	3	2	3	0	2.25	3	1
30	0	16	1	7	3	2	3	2.33	1	2	1
32	0	16	1	8	3	2.33	3	2	1	3	1
39	0	16	1	4	2	2	2.67	2.33	3	3	1
35	0	17	1	7	3	2	3	2.33	2	2.5	1
34	0	16	1	7	3	2	3	2.67	1.75	2	1
42	0	16	1	7	3	2	3	3	3	3	1
33	0	16		8	3	1.33	2.67	2.33	2.5	2	1
26	0	16	1	2	1	1	3	1	1.25	3	1
18	1	13	1	5	2	1.67	0.67	0.67	0.75	3	1
35	1	13	1	6	3	2	0.67	3	3	3	1
	1	13	1	7	3		3	2	2.5	3	1
24	1	14	1	5	2	1.67	1	1.67	1.25	3	1
34	1	14	0	5	2	2.33	3	2	2.25	1.5	1
34	1	14	1	5	2	2.33	2.67	1.33	3	1.5	1
36	1	14	1	9	3	2.67	2.33	1.33	3	2.5	1
28	1	14	1	6	3	2.67	0.33	2	2	2.5	1
40	1	14	1	7	3	2.33	3	2.33	3	2.5	1
22	1	16	1	4	2	2.33	0.67	1.67	1	2	1
31	1	15	1	6	3	2	2.33	1.33	3	1	1
27	1	16	1	5	2	1.67	1.33	0.67	2.5	3	1
29	1	15	1	6	3	2.67	2.67	1.33	1.5	1.5	1
25	1	16	1	6	3	2.33	0	0.67	3	2	1
19	1	15	1	5	2	2.33	0	1.67	1	1.5	1
33	1	15	1	7	3	2.33	2.33	2	1.75	3	1
35	1	15	1	6	3	2.67	1	2.33	3	2.5	1
	1	15	1	7	3	1.67		1.33	2.5	1.5	1
40	1	16	1	7	3	2.67	3	2	3	2.5	1
35	1	16	1	8	3	2.67	2	2	3	1.5	1
38	1	16	1	8	3	2.67	3	2.33	2	3	1
34	1	16	1	6	3	2	1.33	2	3	3	1
29	1	15	1	9	3	2.33	1.67	1	2.25	2.5	1
35	0	12	1	9	3	1.67	3	1	3	3	1
24	0	13	1	6	3	1	3	1.33	1	2	1
	0	12	1	5	2		3	1	3	2	1
	0	12	1	9	3	2.33	3	1	3		1
36	0	12	1	8	3	1.67	3	2	3	2	1
	0	12	1	5	2		2	1.67	3		1
35	0	12	1	5	2	2	2.67	1.67	3	2	1
36	0	12	1	7	3	2	3	1.33	3	2.5	1
	0	12	1	6	3		2.67	1	3	3	1
38	0	12	1	6	3	2.67	3	1.67	3	2	1
34	0	13	1	8	3	2	1.33	2	3	3	1
30	0	12	1	5	2	1.33	1.33	2.67	2.5	2	1
39	0	11	1	6	3	2	3	2.67	3	2	1
35	0	12	1	9	3	1.33	3	2	2.5	3	1
37	0	13	1	3	2	2	3	2	3	2	1
35	0	12	1	7	3	1.33	2.67	3	3	1	1
40	0	12	1	7	3	2	3	2.33	3	3	1
40	0	11	1	9	3	2	3	2.33	3	3	1
	0	12	1	8	3	1.33	0	2.67	3		1
39	0	13	1	4	2	1.67	3	3	2.5	3	1
34	0	12	1	8	3	1.33	3	2.33	3	1	1
36	0	12	1	5	2	1.33	2.67	2.67	3	2	1
32	0	12	1	7	3	1.67	0.67	3	3	2	1
31	0	13	1	7	3	1.33	1	2.67	3	2	1
36	0	12	1	6	3	2	2.67	2	3	2	1
39	0	12	1	8	3	1.33	3	2.67	3	3	1
30	0	12	1	6	3	1.67	0.67	2.33	3	2	1
39	0	12	1	7	3	1.33	3	2.67	3	3	1
33	0	13	1	6	3	1	1	3	3	3	1
	0	12	1	9	3	1.67		2.67	3	2	1
	0	12	1	7	3	2		2.67	3	1	1
33	0	12	1	5	2	2	2	1.33	3	2.5	1
35	0	12	1	2	1	1.67	3	1.33	3	2.5	1
35	0	13	1	4	2	1.67	3	1	3	3	1
30	0	13	1	7	3	1.67	1.33	1	3	3	1
	0	14	1	5	2		3	1.33	2.25	1	1
33	0		1	8	3	0.67	3	2	3	2	1
39	0	13	1	8	3	2.33	3	2.33	2.5	3	1
38	0	12	1	5	2	1.67	3	2.33	3	2.5	1
41	0	13	1	9	3	2.33	3	2.67	3	2.5	1
	0	14	1	5	2		1.33	2.33	1.5	2	1
35	0	13	1	7	3	2	3	2.67	2	2	1
41	0	13	1	9	3	2.33	3	2.33	3	3	1
42	0	13	1	4	2	2.33	3	2.67	3	3	1
42	0	13	1	7	3	2	3	3	3	3	1
40	0	13	1	5	2	2.33	3	2	3	3	1
39	0	13	1	6	3	2	3	2.67	3	2	1
42	0	13	1	7	3	2	3	3	3	3	1
41	0	12	1	8	3	2.33	2.67	3	3	2.5	1
42	0	13	1	6	3	2	3	3	3	3	1
18	0	15	1	9	3	1	3	0	1	1	1
23	0	14	1	7	3	1	3	1	2	0	1
35	0	14	1	7	3	1.67	3	1.67	3	2	1
	0	14	1	8	3		3	1	2	3	1
37	0	14	1	9	3	2.33	3	1	3	3	1
39	0	14	1	8	3	1.67	3	2.67	3	2.5	1
24	0	15	1	6	3	0.67	3	1.67	0.75	2.5	1
32	0	14	1	7	3	1.67	2.33	1.67	3	1.5	1
38	0	14	1	5	2	2	3	2	3	2.5	1
37	0	14	1	6	3	1.67	3	2	3	2.5	1
33	0	16	1	7	3	1.67	3	1.33	3	1.5	1
39	0	14	1	5	2	2.33	2.67	2.67	3	2	1
38	0	14	1	6	3	1.67	3	2.67	3	2	1
40	0	14	1	6	3	2.33	3	2.67	3	2	1
30	0	14	1	6	3	1.33	1.67	1.67	3	2	1
40	0	14	1	9	3	2	3	3	3	2	1
	0	14	1	7	3		3	2.67		2	1
27	0	14	1	8	3	1	2.33	1.33	2.5	1.5	1
40	0	14	1	6	3	2	3	2.33	3	3	1
	0	13	1	5	2		3	3	3	3	1
40	0	14	1	5	2	2.33	3	2	3	3	1
31	0	16	1	5	2	1.67	1.33	2.33	3	1.5	1
41	0	14	1	5	2	2.33	3	2.67	3	2.5	1
	0	22	1	9	3	1.67	0.33		0.25	0	1
32	0	15	1	7	3	1.67	2.67	1	3	2	1
27	0	15	1	6	3	2	0.67	1	3	2	1
36	0	15	1	4	2	2	3	1.33	3	2.5	1
22	0	16	1	7	3	1.33	3	0.67	1	1.5	1
31	0	16	1	4	2	2.33	1.33	1.33	3	2	1
	0	16	1	9	3		3	2	2.5	3	1
40	0	15	1	8	3	2	3	2.33	3	3	1
35	0	15	1	7	3	1.67	3	2	2.5	2.5	1
31	0	15	1	3	2	2	0	2.33	3	3	1
22	0	15	1	3	2	1.33	0	1.33	2.5	2	1
37	0	15	1	4	2	2	3	2	3	2	1
39	0	15	1	9	3	2	3	2.33	3	2.5	1
39	0	15	1	8	3	2	3	2.33	3	2.5	1
39	0	15	1	6	3	2.33	3	2.33	2.5	3	1
33	0	16	1	9	3	1.67	3	2.67	1.75	2	1
31	0	15	1	6	3	1	2.33	2.33	3	1	1
40	0	15	1	7	3	2	3	3	3	2	1
39	0	15	1	8	3	2	2.67	3	3	2	1
	0	15	1	6	3		3	2.33	3	3	1
26	0	15	1	6	3	0.67	1.33	1.33	3	2	1
36	0	17	1	7	3	2	3	3	1.5	3	1
32	0	16	1	3	2	1.67	2.67	1	3	2	1
35	0	16	1	6	3	2.33	3	1	3	2	1
26	0	16	1	8	3	2	0.67	1	3	1.5	1
34	0	17	1	7	3	1.67	3	1.67	2.5	2.5	1
36	0	15	1	8	3	2	3	1.33	3	2.5	1
35	0	16	1	5	2	2	3	2	3	1	1
41	0	18	1	6	3	2	3	2.67	3	3	1
35	0	16	1	7	3	2	2.67	1.67	3	2	1
26	0	17	1	9	3	2	1.67	2.67	1.25	1	1
40	0	16	1	6	3	2.33	3	2.33	3	2.5	1
33	0	18	1	6	3	2	3	2.33	1.75	2	1
34	0	16	1	6	3	2	3	2.33	1.5	3	1
	0	17	1	7	3		3	2.67	2.5	2	1
35	0	18	1	4	2	2.33	2.67	1.33	2.5	3	1
	0	18	1	6	3	2.67	3	2		2	1
	0	18	1	7	3		3	2.67	3	3	1
36	0	19	1	6	3	1.67	1.67	2.67	3	3	1
32	0	19	1	5	2	2	0	2.67	3	3	1
33	0	17	1	9	3	2.33	1	2.33	3	2	1
32	0	17	1	5	2	2.33	1	1.67	3	2.5	1
39	1	12	1	8	3	2.33	3	1.67	3	3	1
38	1	13	1	4	2	2.33	3	1.67	3	2.5	1
36	1	12	1	8	3	1.67	3	1.33	3	3	1
23	1	13	1	5	2	1.33	0.67	1.67	1.5	3	1
30	1	12	1	7	3	2.67	1	1	3	2	1
32	1	12	1	8	3	1.67	3	1.33	2.5	2	1
33	1	12	1	6	3	2	3	1	3	1.5	1
	1	12	1	6	3		3	2	3	2	1
37	1	12	1	3	2	1.67	3	2	3	2.5	1
	1	12	1	9	3		3	1	3	3	1
32	1	12	1	8	3	2	1.33	1.33	3	3	1
36	1	11	1	8	3	1.67	3	1.67	3	2.5	1
36	1	12	1	5	2	2	3	1	3	3	1
38	1	12	1	6	3	2	3	1.67	3	3	1
37	1	12	1	6	3	2.67	2.67	1.67	3	2	1
41	1	12	1	3	2	3	2.67	2.33	3	2.5	1
37	1	12	1	5	2	1.33	2.67	2.33	3	3	1
37	1	12	1	9	3	1.67	3	2.33	3	2	1
40	1	12	1	8	3	2.33	3	2.67	3	2	1
41	1	12	1	6	3	2.33	3	2.33	3	3	1
	1	13	1	5	2		2	2.67	3	2.5	1
22	1	12	1	8	3	1.67	1.33	2.33	0.75	1.5	1
40	1	12	1	5	2	2	3	3	2.5	3	1
31	1	12	1	6	3	2	0	3	3	2	1
	1	12	1	4	2	2.67		2.67	3	2.5	1
	1	12	1	5	2	2.67		3	3	3	1
22	1	11	1	5	2	2	0.67	0.33	3	0.5	1
27	1	14	1	3	2	1.67	0	1.67	3	2.5	1
37	1	13	1	7	3	2.67	3	1.33	3	2	1
36	1	13	1	8	3	2.67	2.33	1.67	3	2	1
29	1	13	1	6	3	1	2	1.67	3	1.5	1
35	1	13	1	9	3	1.33	3	1.67	3	2.5	1
25	1	14	1	5	2	1.33	0.33	1.67	2.5	2.5	1
34	1	13	1	9	3	2	2	2	3	2	1
41	1	13	1	7	3	2	3	2.67	3	3	1
38	1	12	1	9	3	2.33	3	2.33	2.5	2.5	1
42	1	13	1	8	3	2	3	3	3	3	1
31	1	14	1	7	3	2.67	1.33	1.33	2.5	2.5	1
35	1	14	1	5	2	2.67	3	1.33	2.5	2	1
30	1	15	1	7	3	2	0	2	3	3	1
38	1	14	1	8	3	1.67	3	2	3	3	1
37	1	14	1	8	3	2.67	2.67	2	3	1.5	1
	1	14	1	5	2	2.67		2.33	3	2	1
39	1	14	1	2	1	2.33	3	2	3	2.5	1
31	1	15	1	8	3	2.33	0	2	3	3	1
32	1	15	1	7	3	2.67	2.67	2	1.5	2	1
37	1	14	1	8	3	2.67	3	2	2.5	2	1
	1	14	1	9	3	2.67		3	3	3	1
33	1	14	1	3	2	2.33	1.67	2	3	1.5	1
36	1	14	1	7	3	1	3	2.67	3	2	1
37	1	15	1	7	3	2.33	2	3	2.5	2.5	1
33	1	14	1	5	2	1.67	2.33	2	2.25	3	1
	1	14	1	6	3	2.67		1.67	3	3	1
35	1	15	1	5	2	1.33	3	1.33	3	3	1
29	1	16	1	8	3	2.33	2.67	1.67	1.5	1.5	1
30	1	16	1	5	2	0.33	2.67	1	3	3	1
30	1	16	1	8	3	1.67	2.67	2	1.75	2	1
31	1	15	1	6	3	1.67	2.67	1.33	2.5	2	1
35	1	14	1	7	3	2.33	2.33	2	3	1.5	1
31	1	15	1	3	2	1.67	2.33	1.67	2.5	2	1
27	1	16	1	6	3	1.33	0	2	3	2.5	1
34	1	15	1	8	3	2.67	2	1.67	3	1.5	1
37	1	15	1	7	3	2	2.67	1.67	3	3	1
24	1	15	1	8	3	2	2.33	1.33	1	1.5	1
33	1	15	1	7	3	2.33	1.67	1.67	3	2	1
30	1	16	1	8	3	2.33	1	2	2.25	2.5	1
37	1	15	1	7	3	2.33	2.67	1.33	3	3	1
36	1	15	1	5	2	2.33	2.67	1.67	2.5	3	1
28	1	16	1	3	2	2	2	0.67	2	3	1
37	1	15	1	6	3	2	2.67	2	3	2.5	1
39	1	15	1	8	3	2.33	3	2.33	3	2	1
	1	15	1	7	3	2		2.33	3	2	1
40	1	15	1	7	3	2.67	3	2.67	2.5	2.5	1
31	1	17	1	2	1	1	1	2.33	3	3	1
35	1	15	1	8	3	1.67	2.67	1.67	3	2.5	1
34	1	15	1	5	2	2.33	1.33	2.33	3	2	1
35	1	15	1	8	3	2	2	2.33	3	2	1
	1	16	1	6	3	1.33	1.33		0.75	3	1
	1	16	1	7	3	1.33	2		2	3	1
	1	16	1	8	3	2		1.67	3	1.5	1
35	1	18	1	7	3	2	2.67	1.33	3	2.5	1
	1	16	1	7	3	2		1.33	3	2	1
37	1		1	5	2	2.33	3	1.67	3	2	1
31	1	16	1	9	3	1.67	1.67	2	2.5	2.5	1
26	1	15	1	7	3	2.33	0	2.67	1.25	3	1
39	1	15	1	5	2	2.67	2.33	2.33	3	2.5	1
36	1	16	1	7	3	1.67	2.67	2.33	2.5	3	1
39	1	16	1	6	3	2.33	2	2.67	3	3	1
38	1	17	1	7	3	2.67	2.67	2.67	2.5	2	1
30	1	16	1	7	3	1.67	2	2	2.5	1.5	1
38	1	17	1	6	3	2.33	2.67	2.33	2.5	3	1
42	1	16	1	7	3	3	2.67	2.67	3	2.5	1
38	1	16	1	8	3	2.33	1.67	2.67	3	3	1
32	1	17	1	8	3	2.33	2	2	2.5	1.5	1
33	1	17	1	8	3	2.67	1.67	1.33	3	2	1
31	1	17	1	6	3	2	2.33	1.33	2	3	1
	1	17	1	6	3	1.33		1.67	2.5	3	1
	1	18	1	7	3	1.33		1.33	3	3	1
35	1	17	1	8	3	2	3	1.67	3	1.5	1
35	1	17	1	4	2	2	3	2	2.5	2	1
28	1	16	1	7	3	1.33	0.33	1.67	3	3	1
36	1	18	1	6	3	2.33	1.33	2.67	3	2.5	1
32	1	17	1	5	2	2	1.33	2.33	2.5	2.5	1
32	1	17	1	8	3	2	3	2.67	1.25	2	1
36	1	17	1	7	3	3	1.33	2.33	3	2	1
30	0	15	1	6	3	2	3	0.67	2.5	1.5	1
25	0	16	1	6	3	1.67	0.67	1	3	1.5	1
36	0	16	1	3	2	2	3	2	2.5	2.5	1
19	0	17	1	5	2	2.33	0.67	0.67	1	2	1
30	0	15	1	8	3	1.67	1.33	2	3	1.5	1
32	0	15	1	9	3	2	1.67	2	2.5	2.5	1
30	0	16	1	9	3	2	3	1.67	1.25	2.5	1
34	0	16	1	5	2	1.67	3	1.67	2.5	2.5	1
31	0	15	1	8	3	1.67	2	1.67	3	1.5	1
33	0	16	1	5	2	0.67	2.67	2.33	3	2	1
33	0	15	1	4	2	2	1.67	2	3	2	1
31	0	16	1	8	3	1.67	3	2.33	1	3	1
30	0	15	1	9	3	2.33	3	2	1	2	1
38	0	15	1	4	2	1.67	2.67	2.67	3	2.5	1
	0	15	1	8	3	1.67		1.33	3	2	1
31	0	17	1	5	2	1.67	3	2	1.5	2.5	1
41	0	15	1	9	3	2	3	2.67	3	3	1
38	0	17	1	9	3	2.33	3	2.33	2.5	2.5	1
36	0	15	1	6	3	1.67	3	2.33	3	1.5	1
	0	15	1	8	3	1.33		2	2.5	2	1
35	0	15	1	4	2	1.33	3	2.33	3	1.5	1
29	0	15	0	7	3	2.33	2.67	2.33	0.5	2.5	1
38	0	15	1	7	3	1.67	3	2.67	2.5	3	1
37	0	14	1	6	3	1.33	2.67	3	2.5	3	1
39	0	14	1	8	3	2.33	2.33	2.67	3	2.5	1
30	0	17	1	7	3	1	2.67	1.67	2.5	2	1
30	0	17	1	5	2	1.67	2	1	2.5	3	1
32	0	17	1	6	3	2	1.33	2	2.5	3	1
26	0	17	1	7	3	2	0.67	1.67	1.75	3	1
26	0	18	1	3	2	1.33	0.67	1.67	2.5	2.5	1
26	0	17	1	6	3	1.67	0	1.33	3	2.5	1
30	0	17	1	4	2	2	0	2.33	3	2.5	1
	0	17	1	4	2	2.33		2.67	3	2.5	1
35	0	17	1	8	3	2	2	2.67	2.5	2.5	1
29	0	17	1	8	3	2	0.67	1.67	3	2	1
28	1	15	1	7	3	2	0.67	1.67	3	1.5	1
28	1	15	1	6	3	2.33	1.67	1.67	1.25	3	1
27	1	15	1	8	3	2.33	2.67	2	0.75	1.5	1
38	1	15	1	5	2	2.67	2.67	1.67	3	2.5	1
34	1	17	1	6	3	1.67	3	1.33	3	2	1
25	1	16	1	9	3	1.33	2.33	1.67	1	2.5	1
24	1	15	1	8	3	1.33	0.67	1	3	1.5	1
34	1	15	1	6	3	2.67	3	1.67	1.5	3	1
18	1	17	1	5	2	1.33	0.67	1	1	2.5	1
33	1	15	1	7	3	2.33	2	0.67	3	3	1
35	1	14	1	6	3	2.67	2.67	1.67	2	3	1
35	1	15	1	7	3	2.33	2	1.33	3	3	1
37	1	15	1	9	3	2.33	2	2	3	3	1
	1	15	1	7	3	1.67		1.67	3	3	1
31	1	15	1	7	3	2.33	1.33	1.33	3	2	1
36	1	15	1	8	3	2.33	2.33	1.67	3	2.5	1
35	1	15	1	8	3	2.67	2	2	2.5	2.5	1
37	1	15	1	6	3	2	3	2	2.5	3	1
35	1	15	1	4	2	2.33	0.67	2.67	3	3	1
34	1	15	1	4	2	2.33	1.33	2.33	3	2	1
36	1	15	1	5	2	2.33	3	3	1.5	2.5	1
	1	15	1	8	3	2		3	3	3	1
37	1	15	1	7	3	2.67	1	2.67	3	3	1
38	1	15	1	6	3	2.67	2.33	2.67	3	1.5	1
38	1	15	1	7	3	2.67	2.67	3	2	2.5	1
32	1	16	1	6	3	2	2.67	2.67	1.5	2	1
32	1	14	1	4	2	2	2	1	3	2.5	1
23	1	17	1	5	2	2	2.33	1.67	0.75	1	1
	1	17	1	7	3	2.67		1.33	1.5	2	1
31	1	17	1	8	3	2.33	3	1.33	1.25	3	1
33	1	17	1	8	3	2.33	2.33	1.67	2.5	2	1
29	1	17	1	7	3	2.67	0	2	3	1.5	1
20	1	17	1	9	3	1.67	0.67	1.33	1	2.5	1
33	1	17	1	7	3	2	2.67	1	2.5	3	1
22	1	17	1	6	3	1.67	1.33	1	2	1	1
32	1	17	1	8	3	2.33	1.67	2	2	3	1
	1	17	1	6	3	2.33		2	2.5	2.5	1
36	1	17	1	6	3	2.33	2	2	3	2.5	1
23	1	19	1	3	2	1.67	1.67	2	0.75	2	1
35	1	17	1	5	2	1.67	3	2.33	2.5	2	1
32	1	17	1	5	2	2	0	2.67	3	3	1
35	1	16	1	7	3	2.33	1	2.33	3	3	1
39	1	17	1	9	3	2.67	2	2.67	3	2.5	1
31	1	17	1	7	3	2.33	1	2.33	2.5	2	1
34	1	17	1	4	2	2.67	0.67	2.67	2.5	3	1
37	0	13	1	8	3	2	3	1.33	3	3	1
32	0	13	1	4	2	1.33	1.33	2	3	3	1
31	0	14	1	8	3	0.67	1	2.67	3	3	1
38	0	13	1	8	3	2.33	3	2.33	3	1.5	1
40	0	13	0	6	3	2.33	3	2.33	3	2.5	1
38	0	12	1	5	2	2	3	2.33	3	2	1
38	0	13	1	8	3	1.67	3	2.67	3	2	1
36	0	14	1	6	3	1.33	2.67	3	3	1.5	1
40	0	13	1	5	2	2.67	2.67	2.67	3	2	1
37	0	14	1	6	3	2.33	3	1.67	3	2	1
32	0	14	1	7	3	1.33	3	1.33	3	1.5	1
30	0	15	1	9	3	2	2.67	1.33	2	2	1
33	0	14	1	5	2	1.33	2.67	2.33	2.25	2.5	1
34	0	14	1	8	3	1.67	1	2.67	3	3	1
37	0	14	1	9	3	1.67	2.67	2.67	3	2	1
35	0	14	1	9	3	1.67	2.67	2	3	2	1
36	0	14	1	7	3	1.67	2.67	3	3	1	1
33	0	14	1	5	2	2.33	3	2.33	1.5	2	1
40	0	14	1	5	2	2.33	3	2.67	3	2	1
31	0	14	1	8	3	2	2.67	2	1.75	2	1
25	0	15	1	6	3	1.33	0.33	2	3	1	1
32	0	15	1	4	2	0.67	3	2	3	1.5	1
40	0	15	1	8	3	2	3	2.33	3	3	1
31	0	14	1	7	3	2	2.33	1.67	3	0.5	1
	0	16	1	6	3	1.67	2.67	2		3	1
36	0	15	1	7	3	2	2.33	2.33	2.5	3	1
39	0	15	1	7	3	2	3	2.33	3	2.5	1
30	0	15	1	6	3	2	2.67	2.33	1.25	2	1
36	0	15	1	6	3	1	3	2.33	3	2.5	1
30	0	15	1	8	3	1.33	2.67	1.67	2.5	1.5	1
29	0	16	1	8	3	1.33	3	0.33	2.5	2.5	1
31	0	15	1	5	2	1.67	3	2	1.75	2	1
27	0	15	1	8	3	1.67	2.67	0.67	1.5	3	1
	0	16	1	6	3	2		1	3	3	1
37	0	16	1	4	2	2	3	1.33	3	3	1
37	0	16	1	8	3	2.33	2.67	1.67	3	2.5	1
29	0	16	1	6	3	0.67	2.33	1	3	2.5	1
29	0	16	1	5	2	2.33	0.67	2	2.5	2	1
28	0	16	1	5	2	0.67	2.67	2	2	2	1
38	0	16	1	7	3	2	3	2	3	2.5	1
39	0	16	1	7	3	2.67	2.67	2.33	2.5	3	1
33	0	16	1	5	2	1.67	2.67	1.67	2.5	2.5	1
32	0	16	1	6	3	2	1.67	2	3	1.5	1
39	0	16	1	6	3	1.67	2.67	3	3	2.5	1
34	0	16	1	7	3	1.67	2.33	1.67	3	2.5	1
27	0	17	1	7	3	2.33	3	0.33	1	3	1
29	0	17	1	7	3	2.33	2.33	1.33	1.25	3	1
26	0	17	1	6	3	1	2.33	1.67	2.5	0.5	1
29	0	17	1	8	3	1.67	2.67	1	1.75	3	1
33	0	17	1	4	2	2.33	3	1	2	3	1
28	0	17	1	8	3	2	3	1.67	1	2	1
28	0	17	1	8	3	2	2.67	1.33	1.5	2	1
34	0	17	1	8	3	2.33	3	1.33	2	3	1
31	0	19	1	8	3	2.33	2.33	2	1.75	2	1
30	0	16	1	6	3	2	1.67	2	3	0.5	1
33	0	17	1	8	3	1.67	2.67	2	2	3	1
36	0	17	1	7	3	2	2.33	2.33	3	2	1
34	0	16	1	8	3	1.67	1.67	2	3	3	1
	1	13	1	8	3	1.67		2	1.75	3	1
39	1	13	1	5	2	2.33	3	2	3	2.5	1
36	1	13	1	6	3	2.33	2	1.67	3	3	1
36	1	13	1	8	3	1.67	2.67	1.67	3	3	1
34	1	13	1	9	3	2	2.67	1.33	2.5	3	1
38	1	13	1	3	2	2.33	2	2.67	3	2.5	1
42	1	13	1	5	2	2.33	3	2.67	3	3	1
38	1	13	1	9	3	1.67	3	2.67	3	2	1
40	1	13	1	7	3	2.67	2.33	2.67	3	2.5	1
40	1	13	1	8	3	2.33	2.67	2.67	3	2.5	1
39	1	13	1	5	2	2.33	2	3	3	2.5	1
	1	13	1	6	3		3	2.33	2.25	2	1
	1	13	1	7	3	2.67	2.67		3	1.5	1
33	1	14	1	6	3	2	1.67	1.67	3	2.5	1
26	1	13	1	4	2	2.33	0.67	1	3	1	1
34	1	14	1	4	2	2.33	2.33	2	2	3	1
30	1	14	1	7	3	1.33	1.67	1.33	3	2.5	1
30	1	14	1	8	3	2.67	2.33	2.33	1	2	1
34	1	14	1	9	3	3	1.67	2	2.5	2	1
39	1	14	1	4	2	2.33	2.67	2.33	3	2.5	1
36	1	14	1	7	3	2	3	2.67	2.5	1.5	1
36	1	13	1	8	3	2	1.33	2.67	3	3	1
	1	14	1	8	3	2.67		3	3	2	1
31	1	13	1	2	1	2.33	0.67	2	3	2	1
22	1	15	1	4	2	2.33	0.67	1	1.75	1.5	1
32	1	15	1	9	3	2.33	1	1.33	3	3	1
28	1	15	1	4	2	2.33	0.33	1.33	3	2	1
32	1	14	1	9	3	2.67	2	1.33	2.5	2	1
	1	15	1	9	3		2	1.67	3	3	1
28	1	14	1	6	3	1.67	2.33	1.67	1.75	2	1
27	1	15	1	7	3	2.33	0.67	2	2	2	1
33	1	15	1	6	3	2.33	1.67	2	2.5	2.5	1
34	1	15	1	6	3	1	2.67	2	3	2.5	1
27	1	15	1	9	3	2	2.67	1.67	1	2	1
33	1	15	1	8	3	2.33	1	2.67	2.5	2.5	1
35	1	15	1	6	3	1.67	2.33	2.33	3	2	1
24	1	16	1	7	3	1.67	0.67	1	2	3	1
27	1	16	1	7	3	2.33	1.67	1.67	1.25	2.5	1
35	1	16	1	4	2	2.67	1	2	3	3	1
35	1	16	1	9	3	2.33	2.67	2	2.5	2	1
34	1	16	1	7	3	1	3	2.33	2.5	2.5	1
23	1	17	1	8	3	1.67	1.33	0.67	1.75	2.5	1
	1	17	1	7	3		2.67	1.33	2.5	2.5	1
31	1	17	1	9	3	2.33	3	0.33	2.5	2	1
32	1	17	1	6	3	2.33	1.33	1.67	2.5	3	1
32	1	16	1	8	3	2.33	3	1.33	1.5	3	1
34	1	17	1	7	3	2.67	2.33	1	2.5	3	1
38	1	17	1	8	3	2.67	3	1.67	2.5	3	1
27	1	17	1	4	2	2.33	1.67	1.33	1.5	2.5	1
22	1	17	1	6	3	2.33	0	1.33	1.5	2.5	1
23	1	17	1	6	3	2.33	1	1.33	1	2.5	1
29	1	17	1	8	3	2.33	2.33	1	1.5	3	1
29	1	17	1	7	3	2	1	2	2.5	2	1
21	0	13	1	3	2	1.67	2.67	1.67	0.25	1	1
33	0	13	1	8	3	2.33	2.67	0.67	2.5	3	1
37	0	13	1	9	3	2.33	3	1	3	3	1
35	0	13	1	8	3	1.33	3	1.33	3	3	1
36	0	13	1	6	3	2.33	3	1.67	3	1.5	1
36	0	13	1	9	3	2.67	2.67	0.67	3	3	1
33	0	13	1	9	3	2	2.67	0.67	3	2.5	1
37	0	13	1	9	3	2.33	2.67	1.67	3	2.5	1
37	0	12	1	7	3	2.33	3	2.67	2	2.5	1
37	0	13	1	7	3	1.67	3	2	3	2.5	1
41	0	13	1	8	3	2	3	2.67	3	3	1
41	0	13	1	6	3	2.33	2.67	2.67	3	3	1
38	0	13	1	7	3	2.33	3	1.33	3	3	1
34	0	13	1	5	2	2.33	2	1.67	3	2	1
33	0	13	1	8	3	2.33	3	0.67	3	1.5	1
30	0	16	1	8	3	2	2.67	1.67	1.25	3	1
	0	16	1	9	3	1.67	2.67	1.67		2.5	1
37	0	15	1	8	3	1.67	3	2	3	2.5	1
30	0	15	1	6	3	2	2.33	1.67	1.5	3	1
33	0	15	1	9	3	1.67	3	1.33	2.5	2.5	1
36	0	15	1	9	3	1.67	2.67	2	3	2.5	1
28	0	15	1	7	3	1.67	2.67	2	1.75	1	1
29	0	15	1	9	3	1.33	1.67	1.67	3	1.5	1
35	0	15	1	7	3	2	3	1.67	3	1.5	1
39	0	15	1	7	3	1.67	3	3	2.5	3	1
32	0	15	1	8	3	1.67	1.67	3	1.75	3	1
21	0	18	1	7	3	2	2	1	1	1	1
22	0	18	1	8	3	1.33	2	0.33	1.25	3	1
27	0	17	1	8	3	2	2	0.33	2.5	2	1
33	0	17	1	8	3	1.67	3	1	2.5	3	1
35	0	17	1	8	3	2	3	1.33	2.5	3	1
36	0	17	1	8	3	2.33	3	1.33	2.5	3	1
24	0	18	1	9	3	1.67	1	0.33	2.25	3	1
30	0	18	1	5	2	2.33	2.33	1.33	2.5	1	1
33	0	17	1	7	3	2.33	3	1	2	3	1
29	0	17	1	8	3	2.33	3	2	0.75	2	1
28	0	17	1	7	3	2.33	1.33	1.33	2.5	1.5	1
20	0	17	1	7	3	1.33	0.67	1.67	1	2.5	1
29	0	18	1	4	2	2	2.33	2.33	1	2.5	1
	0	17	1	8	3	1.33	0.67		0.25	2.5	1
35	1	13	1	8	3	3	2	1.33	3	2	1
35	1	13	1	5	2	2.67	3	1.67	3	0.5	1
40	1	13	1	8	3	2.67	2.67	2	3	3	1
22	1	12	1	9	3	1	1.67	0.67	1.5	3	1
26	1	13	1	5	2	1.67	0.67	1.67	3	1	1
	1	13	1	8	3	2.33	2	0.33		2.5	1
35	1	13	1	9	3	2.33	2.67	1.67	3	1.5	1
27	1	12	1	6	3	1.33	2.67	1.67	2	1	1
33	1	13	1	7	3	2.67	1.67	1.33	3	2	1
37	1	13	1	8	3	2.67	2.67	1.67	3	2	1
31	1	13	1	9	3	2.67	1.33	1	3	2	1
31	1	13	1	8	3	2.67	1.33	0.67	3	2.5	1
34	1	13	1	6	3	2.67	1.67	1.33	3	2.5	1
29	1	13	1	7	3	2.67	0.67	0.67	3	2.5	1
40	1	13	1	6	3	2.67	3	1.67	3	3	1
40	1	12	1	9	3	2.67	3	2.33	3	2	1
40	1	13	1	8	3	2.67	2.67	2	3	3	1
41	1	13	1	9	3	2.67	2.33	2.67	3	3	1
41	1	13	1	9	3	2.33	3	2.67	3	2.5	1
40	1	12	1	7	3	2.33	2.33	3	3	2.5	1
42	1	13	1	8	3	2.67	2.67	3	3	2.5	1
29	1	13	1	7	3	1	3	2.33	1.25	2.5	1
34	1	15	1	5	2	2.67	2	1.67	2.5	2.5	1
36	1	15	1	8	3	2.67	2	2	3	2	1
	1	15	1	9	3	2	3	1.67		1.5	1
33	1	15	1	8	3	2	2	1.67	3	2	1
30	1	15	1	7	3	2.67	2.67	1.67	1	2.5	1
33	1	15	1	8	3	3	2.33	1.67	1.75	2.5	1
34	1	15	1	6	3	2.33	2	1.33	3	2.5	1
31	1	15	1	8	3	2.33	3	1.67	1.5	2	1
36	1	15	1	7	3	1.67	3	1.33	3	3	1
31	1	15	1	7	3	2.33	2	2	2	2	1
39	1	15	1	6	3	2.33	3	3	2.5	2	1
26	1	17	1	5	2	2.33	1.67	1	1.5	2.5	1
19	1	16	1	6	3	1.67	0	0.67	1.5	3	1
28	1	17	1	9	3	3	3	1	0.25	3	1
30	1	17	1	8	3	1.67	2.33	1.67	2.5	1.5	1
21	1	18	1	4	2	2.33	2	0.67	0.25	2.5	1
	1	17	1	7	3	1.33	0	1.33		3	1
15	1	17	1	5	2	1.67	0	0.67	1.5	1	1
	1	17	1	5	2	2.33	3	0.67		1.5	1
	1	17	1	6	3		2	1.33	1	2	1
25	1	17	1	7	3	2.33	3	1	0	3	1
32	1	17	1	4	2	1.67	3	0.67	3	2	1
28	1	18	1	6	3	2.33	0.67	1.67	2.5	2	1
32	1	17	1	6	3	2.33	2.33	0.67	2.5	3	1
35	1	17	1	7	3	2.67	2.33	1.33	2.5	3	1
38	1	17	1	6	3	2.67	3	1.67	3	2	1
29	1	17	1	7	3	2.33	3	1	1	3	1
32	1	17	1	8	3	2.67	2.67	0.33	2.5	2.5	1
19	1	17	1	7	3	1	0	1.33	1.75	2.5	1
30	1	17	1	9	3	2.33	2.67	1.67	1.25	2.5	1
30	1	17	1	7	3	2	1.67	1.33	2.5	2.5	1
36	1	17	1			3	2.67	1.33	2.25	3	1
30	1	17	1	6	3	2.33	1.33	1.33	2.25	3	1
31	1	19	1	9	3	2	3	1	1.75	3	1
	1	17	1	6	3	1.67	2	2		1.5	1
35	1	16	1	5	2	3	3	1.33	2.5	1.5	1
28	1	17	1	6	3	2.67	1.33	1.33	1.5	3	1
25	1	17	1	9	3	0.67	2	0.33	2.5	3	1
21	1	18	1	8	3	2	2	1.67	0.25	1.5	1
26	1	17	1	8	3	2.67	3	0.33	1.25	1.5	1
28	1	17	1	9	3	1.67	2	1	2	3	1
30	1	17	1	2	1	2	3	1	2	2	1
27	1	17	1	6	3	2	2.67	1	1	3	1
33	1	17	1	6	3	2.67	2.67	1.67	1.5	3	1
28	1	17	1	6	3	1.67	1.67	0.67	2.5	3	1
30	1	17	1	6	3	2.67	0.67	2	2	3	1
21	1	18	1	8	3	1	1.33	1	1.75	2	1
36	1	17	1	6	3	2.67	3	1	2.5	3	1
34	1	18	1	5	2	1.67	3	2	3	1	1
35	1	17	1	6	3	2.67	3	1.67	1.75	3	1
28	1	18	1	6	3	2.67	1.67	1.67	1.5	2	1
37	1	17	1	7	3	2	2.67	2.33	2.5	3	1
32	1	19	1	8	3	2.67	2	3	1	2.5	1
37	1	22	1	4	2	2.33	2.67	2.33	2.5	2.5	1
	1	17	1	5	2		0	2.33	3	1.5	1
42	1	17	1	7	3	2.67	3	2.33	3	3	1
39	1	17	1	6	3	2.67	2.67	2.33	2.5	3	1
20	1	17	1	6	3	1.67	0	0.33	3	1	1
			1								1
35	0	12	1	4	2	2	2.67	1	3	3	1
26	0	13	1	8	3	1.67	2.67	1	1.5	2	1
33	0	13	1	6	3	1	3	1.33	3	2.5	1
34	0	12	1	3	2	2.33	2.33	1.67	3	1.5	1
39	0	12	1	7	3	2.33	3	2.67	3	1.5	1
37	0	11	1	6	3	1.67	3	2.33	3	2	1
30	0	11	1	9	3	2.33	3	2	0.75	2.5	1
33	0	13	1	3	2	2	2.33	2	2.5	2	1
41	0	12	1	9	3	2	3	2.67	3	3	1
34	0	14	1	8	3	1.33	3	2	2.5	2.5	1
41	0	12	1	6	3	2.33	2.33	3	3	3	1
40	0	12	1	7	3	2	3	2.33	3	3	1
39	0	12	1	8	3	2	3	2.67	3	2	1
43	0	12	1	8	3	2.33	3	3	3	3	1
40	0	12	1	8	3	2	2.33	3	3	3	1
35	0	12	1	8	3	2	2.67	1.67	3	2	1
41	0	12	1	9	3	2	3	2.67	3	3	1
39	0	12	1			1.67	2.67	2.67	3	3	1
42	0	12	1	7	3	2.33	3	2.67	3	3	1
39	0	12	1	9	3	1.67	3	2.67	3	2.5	1
39	0	11	1	5	2	1.67	3	2.67	3	2.5	1
	0	12	1								1
	0	13	1	8	3	1.33	3		3	1.5	1
	0	13	1	8	3		3	2	3	2	1
38	0	13	1	7	3	2	3	2	3	2.5	1
35	0	14	1	8	3	2.33	2.67	1.33	2.5	3	1
37	0	13	1	9	3	1.33	3	2.67	3	2	1
33	0	12	1	6	3	1.33	3	1.67	2.5	2.5	1
34	0	14	1	7	3	2	1.67	2.33	3	2	1
37	0	14	1	9	3	1.33	3	2.67	3	2	1
	0	13	1	4	2		3	3	2.5	2	1
40	0	13	1	7	3	1.33	3	3	3	3	1
39	0	13	1	8	3	1.67	3	2.67	3	2.5	1
42	0	13	1	3	2	2.33	3	2.67	3	3	1
42	0	13	1	9	3	2.67	3	2.33	3	3	1
40	0	13	1	6	3	2.33	3	2.33	3	2.5	1
40	0	13	1	7	3	2.33	3	2.67	3	2	1
39	0	13	1	9	3	2	3	2	3	3	1
33	0	13	1	6	3	1	3	2.67	2.5	1.5	1
	0	14	1	9	3	2.33	3	2.67		2.5	1
38	0	13	1	6	3	1.67	2.67	3	3	2	1
41	0	13	1	8	3	2.33	3	2.67	3	2.5	1
42	0	13	1	9	3	2.33	3	2.67	3	3	1
26	0	14	1	9	3	1.33	0	2.33	3	1.5	1
38	0	14	1	8	3	1.67	3	2.67	3	2	1
38	0	12	1	8	3	1.67	3	3	3	1.5	1
33	0	13	1	7	3	1	3	1.33	3	2.5	1
39	0	13	1	8	3	1.33	3	3	3	2.5	1
34	0	14	1	8	3	2	3	0.67	3	2.5	1
33	0	14	1	7	3	1.33	2.67	1	3	3	1
33	0	15	1	9	3	2	3	1	3	1.5	1
31	0	15	1	6	3	1	2.67	1.33	3	2	1
30	0	14	1	8	3	1.33	3	0.67	2.5	2.5	1
34	0	14	1	7	3	2	2.67	1.33	2.5	3	1
38	0	14	1	9	3	1.67	3	2	3	3	1
30	0	14	1	7	3	1	2	1.67	2.5	3	1
34	0	14	1	8	3	1.67	2.67	2.33	2.25	2.5	1
41	0	14	1	8	3	2	2.67	3	3	3	1
31	0	14	1	3	2	2	1.33	2.33	3	1	1
	0	13	1	6	3	2		2.33	3	2.5	1
39	0	13	1	7	3	2.33	2	2.67	3	3	1
37	0	14	1	9	3	2.33	3	2.33	2.5	2	1
28	0	15	1	7	3	2	3	1	1.75	1.5	1
34	0	15	1	8	3	1.33	3	1	3	3	1
33	0	16	1	4	2	2.33	3	0.67	2.5	2.5	1
35	0	15	1	7	3	2	2.67	1.67	2.5	3	1
28	0	16	1	5	2	1	2.67	0.33	3	2	1
36	0	15	1	7	3	2.33	3	1.33	3	2	1
34	0	15	1	7	3	2	3	1.33	3	1.5	1
36	0	15	1	7	3	2	3	1.67	3	2	1
32	0	16	1	9	3	2.33	2.67	1.67	1.75	2.5	1
26	0	15	1	5	2	2	2.67	1.67	1.25	1	1
29	0	14	1	5	2	2	1.33	1.33	2.5	2.5	1
39	0	15	1	7	3	2	3	2	3	3	1
33	0	15	1	5	2	2	3	1.67	2	2.5	1
28	0	16	1	7	3	1.67	2.33	2.33	1	2.5	1
38	0	15	1	6	3	2	2.33	2.67	3	2.5	1
33	0	15	1	6	3	2	2	2.33	2.25	2.5	1
33	0	14	1	4	2	1.67	2	1.33	3	3	1
37	0	15	1	6	3	2	2.33	2.67	3	2	1
40	0	15	1	6	3	1.67	3	2.67	3	3	1
37	0	15	1	4	2	0.67	3	2.67	3	3	1
34	0	15	1	9	3	2	3	2.67	1.75	2	1
32	0	15	1	8	3	1.33	2	1.33	3	3	1
40	0	14	1	8	3	1.67	2.67	3	3	3	1
36	0	15	1	7	3	2	3	1.67	3	2	1
28	0	18	1	5	2	2.33	2.67	2	0.25	3	1
26	0	18	1	6	3	2	2.33	2	0.75	2	1
	0	16	1	6	3	1.67	0.67		1	2	1
29	0	16	1	9	3	1.67	2.67	0.33	2.5	2.5	1
26	0	17	1	5	2	1.67	3	0.33	2.5	0.5	1
25	0	17	1	9	3	0.33	3	2.33	1.25	1.5	1
31	0	18	1	7	3	1.67	3	2.33	2	1	1
30	0	16	1	8	3	2.33	2	2.33	1	3	1
30	0	17	1	7	3	0	3	1.67	3	2	1
24	0	18	1	5	2	2	2.67	0.33	1.5	1.5	1
	0	17	1								1
35	0	19	1	7	3	2	2	1.67	3	3	1
34	0	18	1	8	3	2	2.67	3	1.5	2.5	1
26	0	16	1	7	3	2	2.33	1	1	3	1
31	0	16	1	5	2	1	3	1.67	2.5	2	1
20	0	16	1	8	3	1.67	1.33	0.67	0.75	3	1
32	0	16	1	8	3	1.67	2.67	1	2.5	3	1
37	0	16	1	7	3	1.67	3	2	3	2.5	1
24	0	16	1	5	2	1	2	1.67	1	3	1
	0	16	1	9	3	2.33		2		3	1
37	0	16	1	8	3	2	2.67	1.67	3	3	1
19	0	16	1	6	3	1.33	1	1.33	1	2	1
37	0	16	1	9	3	2.33	2.67	2.33	3	1.5	1
34	0	16	1	7	3	1.33	1.67	2.33	3	3	1
37	0	16	1	8	3	1.67	2.67	2.67	2.5	3	1
38	0	16	1	7	3	2.33	2.67	2.33	2.5	3	1
33	0	16	1	8	3	2.33	1.33	2.33	3	1.5	1
28	0	16	1	7	3	1	3	2	1.75	1.5	1
35	0	16	1	8	3	2	1.33	2.33	3	3	1
31	0	16	1	7	3	1.67	2	2.67	1.75	2.5	1
29	0	16	1	8	3	2	0.67	2.33	2.5	2	1
27	0	16	1	9	3	2	2.67	2	1	1.5	1
29	0	19	1	7	3	2	2.67	0.33	2	3	1
22	0	17	1	9	3	1.67	1.33	1.67	1	2	1
32	0	18	1	8	3	1.33	2.33	2	2.5	2.5	1
25	0	17	1	8	3	2.33	0	2	1.5	3	1
37	0	17	1	7	3	2.33	3	2.33	2.5	2	1
32	0	17	1	7	3	2.33	2.67	1.33	3	0.5	1
40	1	12	1	7	3	2	3	2.33	3	3	1
33	1	12	1	8	3	1.33	1.67	2	3	3	1
38	1	12	1	7	3	2.67	2	2	3	3	1
	1	13	1	6	3	1.67		2.33	1.75	3	1
37	1	12	1	7	3	2	3	3	3	0.5	1
41	1	12	1	9	3	2.67	2.33	2.67	3	3	1
37	1	12	1	7	3	1.67	2.33	2.67	3	2.5	1
44	1	12	1	8	3	2.67	3	3	3	3	1
43	1	12	1	9	3	2.33	3	3	3	3	1
38	1	12	1	6	3	1.33	3	3	3	2	1
32	1	14	1	9	3	1.33	2.67	3	1.25	3	1
36	1	12	1	7	3	2.33	1.67	2.33	3	2.5	1
36	1	12	1	6	3	2	1.33	2.67	3	3	1
	1	12	1	5	2	2.33		3	3	3	1
44	1	12	1	7	3	3	3	3	3	2.5	1
40	1	11	1	6	3	2.67	3	2.67	2.5	2.5	1
37	1	11	1	6	3	2.33	1.33	2.67	3	3	1
44	1	11	1	7	3	2.67	3	3	3	3	1
[truncated: 992 more rows]
